# Supplementary material for: Synthesis and characterization of carbonyl functionalized organotellurium( iv ) derivatives
Source: Royal Society of Chemistry journal article supplement (doi:10.1039/d4ra06023g), 2024-01-01
Supplement: d4ra06023g1.pdf [file d4ra06023g1.pdf]

## Supporting Info file

for

### Synthesis and Characterization of Carbonyl Functionalized Organotellurium(IV) Derivatives

Puspendra Singh,<sup>\*a</sup> Mariya Khan,<sup>b</sup> Andrew Duthie,<sup>c</sup> Ray J. Butcher<sup>d</sup>

<sup>a</sup>Department of Chemistry, Dr. Shakuntala Misra National Rehabilitation University,  
Lucknow, 226017, India.

<sup>b</sup>Department of Chemistry, University of Lucknow, Lucknow, 226007, India.

<sup>c</sup>Department of Chemistry, Indian Institute of Technology Kanpur, Kanpur, 208016, India

<sup>d</sup>Department of Chemistry, Howard University, Washington DC20059, USA

\*Corresponding Author, E-mail address: [pushpendrasingh0612@gmail.com](mailto:pushpendrasingh0612@gmail.com)

#### INDEX

| S.No. | Content                                                                                                                                                                                    | Page No.     |
|-------|--------------------------------------------------------------------------------------------------------------------------------------------------------------------------------------------|--------------|
|       | <b>Index</b>                                                                                                                                                                               | <b>S1-S3</b> |
| 1     | <b>Table S1.</b> Crystal Data and Structure Refinement Details of 1, 4 and 5                                                                                                               | <b>S4</b>    |
| 2     | <b>Table S2.</b> Hydrogen bonds for 1, 4 and 5 (Å and °).                                                                                                                                  | <b>S5</b>    |
| 3     | <b>Fig. S1</b> Crystal lattices of compound 1 showing helical structure through C-H---Cl (green) hydrogen bonding interactions.                                                            | <b>S6</b>    |
| 4     | <b>Fig. S2</b> Crystal lattices of compound 1 showing O-H---O (red), C-H---Cl and (green) hydrogen bonding interactions and Te---O (blue) & Te---Cl (black) secondary bonding interaction. | <b>S7</b>    |
| 5     | <b>Fig. S3</b> Crystal lattices of compound 1 showing $\pi$ --- $\pi$ (brown) interaction.                                                                                                 | <b>S7</b>    |
| 6     | <b>Fig. S4.</b> Centrosymmetric dimeric unit in the crystal lattices of compound 1 through C-H---Cl (green) hydrogen bonding interactions.                                                 | <b>S8</b>    |
| 7     | <b>Fig. S5.</b> Centrosymmetric dimeric unit in the crystal lattices of compound 4 through O-H---O (purple) hydrogen bonding interactions, Te---O (blue) secondary bonding interaction.    | <b>S8</b>    |
| 8     | <b>Fig. S6.</b> Supramolecular architecture along c axis of compound 4.                                                                                                                    | <b>S9</b>    |

|    |                                                                                                                                                                                                  |                |
|----|--------------------------------------------------------------------------------------------------------------------------------------------------------------------------------------------------|----------------|
| 9  | <b>Fig. S7.</b> Supramolecular architecture along c axis of compound <b>4</b> .                                                                                                                  | <b>S9</b>      |
| 10 | <b>Fig. S8-S10</b> Supramolecular architectures in the crystal lattices of compound <b>5</b> .                                                                                                   | <b>S10-S11</b> |
| 11 | <b>Fig. S11</b> <sup>1</sup> H NMR spectrum of compound Ph[PhC(OH)CHC(O)CH <sub>2</sub> ] <sub>2</sub> TeCl <sub>2</sub> ( <b>1</b> ) in CDCl <sub>3</sub> .                                     | <b>S12</b>     |
| 12 | <b>Fig. S12</b> Expanded aryl region of <sup>1</sup> H NMR spectrum of compound Ph[PhC(OH)CHC(O)CH <sub>2</sub> ] <sub>2</sub> TeCl <sub>2</sub> ( <b>1</b> ) in CDCl <sub>3</sub> .             | <b>S13</b>     |
| 13 | <b>Fig. S13</b> <sup>13</sup> C NMR spectrum of compound Ph[PhC(OH)CHC(O)CH <sub>2</sub> ] <sub>2</sub> TeCl <sub>2</sub> ( <b>1</b> ) in CDCl <sub>3</sub> .                                    | <b>S14</b>     |
| 14 | <b>Fig. S14</b> Expanded aryl region of <sup>13</sup> C NMR spectrum of compound Ph[PhC(OH)CHC(O)CH <sub>2</sub> ] <sub>2</sub> TeCl <sub>2</sub> ( <b>1</b> ) in CDCl <sub>3</sub> .            | <b>S15</b>     |
| 15 | <b>Fig. S15</b> <sup>125</sup> Te NMR spectrum of compound Ph[PhC(OH)CHC(O)CH <sub>2</sub> ] <sub>2</sub> TeCl <sub>2</sub> ( <b>1</b> ) in CDCl <sub>3</sub> .                                  | <b>S16</b>     |
| 16 | <b>Fig. S16</b> <sup>1</sup> H NMR spectrum of compound <i>p</i> -Tol[PhC(OH)CHC(O)CH <sub>2</sub> ] <sub>2</sub> TeCl <sub>2</sub> ( <b>2</b> ) in CDCl <sub>3</sub> .                          | <b>S17</b>     |
| 17 | <b>Fig. S17</b> Expanded aryl region of <sup>1</sup> H NMR spectrum of compound <i>p</i> -Tol[PhC(OH)CHC(O)CH <sub>2</sub> ] <sub>2</sub> TeCl <sub>2</sub> ( <b>2</b> ) in CDCl <sub>3</sub> .  | <b>S18</b>     |
| 18 | <b>Fig. S18</b> <sup>13</sup> C NMR spectrum of compound <i>p</i> -Tol[PhC(OH)CHC(O)CH <sub>2</sub> ] <sub>2</sub> TeCl <sub>2</sub> ( <b>2</b> ) in CDCl <sub>3</sub> .                         | <b>S19</b>     |
| 19 | <b>Fig. S19</b> Expanded aryl region of <sup>13</sup> C NMR spectrum of compound <i>p</i> -Tol[PhC(OH)CHC(O)CH <sub>2</sub> ] <sub>2</sub> TeCl <sub>2</sub> ( <b>2</b> ) in CDCl <sub>3</sub> . | <b>S20</b>     |
| 20 | <b>Fig. S20</b> <sup>125</sup> Te NMR spectrum of compound <i>p</i> -Tol[PhC(OH)CHC(O)CH <sub>2</sub> ] <sub>2</sub> TeCl <sub>2</sub> ( <b>2</b> ) in CDCl <sub>3</sub> .                       | <b>S21</b>     |
| 21 | <b>Fig. S21</b> <sup>1</sup> H NMR spectrum of compound <i>l</i> -Nap[PhC(OH)CHC(O)CH <sub>2</sub> ] <sub>2</sub> TeCl <sub>2</sub> ( <b>3</b> ) in CDCl <sub>3</sub> .                          | <b>S22</b>     |
| 22 | <b>Fig. S22</b> Expanded aryl region of <sup>1</sup> H NMR spectrum of compound <i>l</i> -Nap[PhC(OH)CHC(O)CH <sub>2</sub> ] <sub>2</sub> TeCl <sub>2</sub> ( <b>3</b> ) in CDCl <sub>3</sub> .  | <b>S23</b>     |
| 23 | <b>Fig. S23</b> <sup>13</sup> C NMR spectrum of compound <i>l</i> -Nap[PhC(OH)CHC(O)CH <sub>2</sub> ] <sub>2</sub> TeCl <sub>2</sub> ( <b>3</b> ) in CDCl <sub>3</sub> .                         | <b>S24</b>     |
| 24 | <b>Fig. S24</b> Expanded aryl region of <sup>13</sup> C NMR spectrum of compound <i>l</i> -Nap[PhC(OH)CHC(O)CH <sub>2</sub> ] <sub>2</sub> TeCl <sub>2</sub> ( <b>3</b> ) in CDCl <sub>3</sub> . | <b>S25</b>     |
| 25 | <b>Fig. S25</b> <sup>125</sup> Te NMR spectrum of compound <i>l</i> -Nap[PhC(OH)CHC(O)CH <sub>2</sub> ] <sub>2</sub> TeCl <sub>2</sub> ( <b>3</b> ) in CDCl <sub>3</sub> .                       | <b>S26</b>     |
| 26 | <b>Fig. S26</b> <sup>1</sup> H NMR spectrum of compound Mes[PhC(OH)CHC(O)CH <sub>2</sub> ] <sub>2</sub> TeCl <sub>2</sub> ( <b>4</b> ).                                                          | <b>S27</b>     |
| 27 | <b>Fig. S27</b> Expanded aryl region of <sup>1</sup> H NMR spectrum of compound Mes[PhC(OH)CHC(O)CH <sub>2</sub> ] <sub>2</sub> TeCl <sub>2</sub> ( <b>4</b> ).                                  | <b>S28</b>     |
| 28 | <b>Fig. S28</b> <sup>13</sup> C NMR spectrum of compound Mes[PhC(OH)CHC(O)CH <sub>2</sub> ] <sub>2</sub> TeCl <sub>2</sub> ( <b>4</b> ) in CDCl <sub>3</sub> .                                   | <b>S29</b>     |
| 29 | <b>Fig. S29</b> Expanded aryl region of <sup>13</sup> C NMR spectrum of compound Mes[PhC(OH)CHC(O)CH <sub>2</sub> ] <sub>2</sub> TeCl <sub>2</sub> ( <b>4</b> ) in CDCl <sub>3</sub> .           | <b>S30</b>     |
| 30 | <b>Fig. S30</b> <sup>125</sup> Te NMR spectrum of compound Mes[PhC(OH)CHC(O)CH <sub>2</sub> ] <sub>2</sub> TeCl <sub>2</sub> ( <b>4</b> ) in CDCl <sub>3</sub> .                                 | <b>S31</b>     |
| 31 | <b>Fig. S31</b> <sup>1</sup> H NMR spectrum of compound Mes[CH <sub>3</sub> (OH)CHC(O)CH <sub>2</sub> ] <sub>2</sub> TeCl <sub>2</sub> ( <b>5</b> ).                                             | <b>S32</b>     |
| 32 | <b>Fig. S32</b> Expanded aryl region of <sup>1</sup> H NMR spectrum of compound Mes[CH <sub>3</sub> (OH)CHC(O)CH <sub>2</sub> ] <sub>2</sub> TeCl <sub>2</sub> ( <b>5</b> ).                     | <b>S33</b>     |
| 33 | <b>Fig. S33</b> <sup>13</sup> C NMR spectrum of compound Mes[CH <sub>3</sub> (OH)CHC(O)CH <sub>2</sub> ] <sub>2</sub> TeCl <sub>2</sub> ( <b>5</b> ) in CDCl <sub>3</sub> .                      | <b>S34</b>     |

|    |                                                                                                                                                                                        |            |
|----|----------------------------------------------------------------------------------------------------------------------------------------------------------------------------------------|------------|
| 34 | <b>Fig. S34</b> Expanded alkyl region of $^{13}\text{C}$ NMR spectrum of compound Mes[CH <sub>3</sub> (OH)CHC(O)CH <sub>2</sub> ]TeCl <sub>2</sub> ( <b>5</b> ) in CDCl <sub>3</sub> . | <b>S35</b> |
| 35 | <b>Fig. S35</b> $^1\text{H}$ NMR spectrum of compound Mes[CH <sub>3</sub> (OH)CHC(O)CH <sub>2</sub> ]TeBr <sub>2</sub> ( <b>6</b> ).                                                   | <b>S36</b> |
| 36 | <b>Fig. S36</b> Expanded aryl region of $^1\text{H}$ NMR spectrum of compound Mes[CH <sub>3</sub> (OH)CHC(O)CH <sub>2</sub> ]TeBr <sub>2</sub> ( <b>6</b> ).                           | <b>S37</b> |
| 37 | <b>Fig. S37</b> Expanded aryl region of $^{13}\text{C}$ NMR spectrum of compound Mes[CH <sub>3</sub> (OH)CHC(O)CH <sub>2</sub> ]TeBr <sub>2</sub> ( <b>6</b> ) in CDCl <sub>3</sub> .  | <b>S38</b> |
| 38 | <b>Fig. S38</b> $^{125}\text{Te}$ NMR spectrum of compound Mes[CH <sub>3</sub> (OH)CHC(O)CH <sub>2</sub> ]TeBr <sub>2</sub> ( <b>6</b> ) in CDCl <sub>3</sub> .                        | <b>S39</b> |

**Table S1. Crystal Data and Structure Refinement Details of 1, 4 and 5**

|                                                             | 1                                                                   | 4                                                                   | 5                                                                   |
|-------------------------------------------------------------|---------------------------------------------------------------------|---------------------------------------------------------------------|---------------------------------------------------------------------|
| empirical formula                                           | C <sub>16</sub> H <sub>14</sub> Cl <sub>2</sub> O <sub>2</sub> Te   | C <sub>19</sub> H <sub>20</sub> Cl <sub>2</sub> O <sub>2</sub> Te   | C <sub>14</sub> H <sub>18</sub> Cl <sub>2</sub> O <sub>2</sub> Te   |
| formula mass (g mol <sup>-1</sup> )                         | 436.77                                                              | 478.85                                                              | 416.78                                                              |
| Temp (K)                                                    | 100(2)                                                              | 123(2)                                                              | 100(2)                                                              |
| Wavelength, $\lambda$ (Å)                                   | 0.710 73                                                            | 0.710 73                                                            | 0.710 73                                                            |
| cryst syst                                                  | monoclinic                                                          | monoclinic                                                          | monoclinic                                                          |
| cryst size (mm <sup>3</sup> )                               | 0.55 x 0.10 x 0.09                                                  | 0.77 x 0.55 x 0.35                                                  | 0.44 x 0.27 x 0.23                                                  |
| space group                                                 | <i>P</i> 2 <sub>1</sub> / <i>c</i>                                  | <i>P</i> 2 <sub>1</sub> / <i>c</i>                                  | <i>P</i> 2 <sub>1</sub>                                             |
| <i>a</i> (Å)                                                | 13.395(3)                                                           | 8.7845(4)                                                           | 8.389(5)                                                            |
| <i>b</i> (Å)                                                | 13.251(3)                                                           | 19.5434(8)                                                          | 12.312(5)                                                           |
| <i>c</i> (Å)                                                | 9.036(2)                                                            | 11.0751(5)                                                          | 8.461(5)                                                            |
| $\alpha$ (deg)                                              | 90                                                                  | 90                                                                  | 90.000(5)                                                           |
| $\beta$ (deg)                                               | 98.213(4)                                                           | 97.679(4)                                                           | 116.320(5)                                                          |
| $\gamma$ (deg)                                              | 90                                                                  | 90                                                                  | 90.000(5)                                                           |
| Volume (Å <sup>3</sup> )                                    | 1587.5(7)                                                           | 1884.3(1)                                                           | 783.3(7)                                                            |
| <i>Z</i>                                                    | 4                                                                   | 4                                                                   | 2                                                                   |
| $\rho_{\text{calcd}}$ (Mg m <sup>3</sup> )                  | 1.827                                                               | 1.688                                                               | 1.767                                                               |
| abs coeff (mm <sup>-1</sup> )                               | 2.211                                                               | 1.871                                                               | 2.235                                                               |
| F(000)                                                      | 848                                                                 | 944                                                                 | 408                                                                 |
| $\theta$ range (deg)                                        | 2.17–32.17                                                          | 3.13–40.86                                                          | 2.69–41.13                                                          |
| index ranges                                                | -19 ≤ <i>h</i> ≤ 18,<br>-18 ≤ <i>k</i> ≤ 19,<br>-13 ≤ <i>l</i> ≤ 12 | -15 ≤ <i>h</i> ≤ 16,<br>-35 ≤ <i>k</i> ≤ 27,<br>-20 ≤ <i>l</i> ≤ 19 | -14 ≤ <i>h</i> ≤ 15,<br>-22 ≤ <i>k</i> ≤ 22,<br>-15 ≤ <i>l</i> ≤ 11 |
| no. of rflns collected                                      | 12748                                                               | 24302                                                               | 11130                                                               |
| no. of indep rflns                                          | 5046                                                                | 11990                                                               | 7370                                                                |
|                                                             | ( <i>R</i> (int) = 0.0344)                                          | ( <i>R</i> (int) = 0.0256)                                          | ( <i>R</i> (int) = 0.0295)                                          |
| completeness to $\theta_{\text{max}}$ (%)                   | 99.4                                                                | 99.8                                                                | 99.5                                                                |
| abs cor                                                     | semiempirical<br>from equivalents                                   | analytical                                                          | analytical                                                          |
| max. min. transmission                                      | 0.7464, 0.4720                                                      | 0.593, 0.434                                                        | 0.733, 0.564                                                        |
| refinement method                                           | full-matrix least<br>squares on F <sup>2</sup>                      | full-matrix least<br>squares on F <sup>2</sup>                      | full-matrix least<br>squares on F <sup>2</sup>                      |
| No. of data/restraints/<br>parameters                       | 5046/0/194                                                          | 11990/0/224                                                         | 7370/1/179                                                          |
| goodness of fit on F <sup>2</sup>                           | 1.040                                                               | 1.088                                                               | 1.019                                                               |
| final <i>R</i> indices [ <i>I</i> > 2 $\sigma$ ( <i>I</i> ) | <i>R</i> 1 = 0.0224,<br>w <i>R</i> 2 = 0.0570                       | <i>R</i> 1 = 0.0345,<br>w <i>R</i> 2 = 0.0652                       | <i>R</i> 1 = 0.0292,<br>w <i>R</i> 2 = 0.0569                       |
| <i>R</i> indices (all data)                                 | <i>R</i> 1 = 0.0255,<br>w <i>R</i> 2 = 0.0586                       | <i>R</i> 1 = 0.0515,<br>w <i>R</i> 2 = 0.0707                       | <i>R</i> 1 = 0.0344,<br>w <i>R</i> 2 = 0.0601                       |
| largest diff peak/hole (e Å <sup>-3</sup> )                 | 1.013/-0.549                                                        | 0.687/-1.097                                                        | 1.285/-0.985                                                        |

**Table S2.** Hydrogen bonds for **1**, **4** and **5** (Å and °).

|          | <b>D-H...A</b>       | <b>d(D-H)</b> | <b>d(H...A)</b> | <b>d(D...A)</b> | <b>∠(DHA)</b> | <b>Symmetry</b>     |
|----------|----------------------|---------------|-----------------|-----------------|---------------|---------------------|
| <b>1</b> | O(2)-H(2)···O(1)     | 0.80(3)       | 1.824(3)        | 2.559(2)        | 154(3)        |                     |
|          | C(9)-H(9A)···Cl(1)   | 0.95          | 2.667(1)        | 3.541(2)        | 153.1         | x,-y+1/2,z-1/2      |
|          | C(6)-H(5A)···Cl(1)   | 0.95          | 2.785(1)        | 3.261(2)        | 111.9         | -1+x, 0.5-y, -1.5+z |
|          | C(9)-H(9A)···Cl(1)   | 0.95          | 2.667(1)        | 3.541(2)        | 153.1         | 1-x, 0.5+y, 0.5-z   |
|          | C(15)-H(15A)···Cl(2) | 0.95          | 2.861(1)        | 3.783(2)        | 163.7         | -1-x, y, -1+z       |
|          | C(2)-H(2A)···Cl(2)   | 0.95          | 2.853(1)        | 3.302(2)        | 110.1         | 1-x, 1-y, 1+z       |
|          | C(13)-H(13A)···O(1)  | 0.95          | 2.427(1)        | 3.339(2)        | 160.9         | 1-x, 1-y, 1-z       |
| <b>4</b> | O(2)-H(2)···O(1)     | 0.75(2)       | 1.854(2)        | 2.541(1)        | 151(3)        |                     |
|          | O(2)-H(2)···O(1)     | 0.75(2)       | 2.419(2)        | 2.884(2)        | 121(2)        | -x+1,-y+1,-z+1      |
|          | C(9)-H(9B)···Cl(2)   | 0.98          | 2.881(0)        | 3.629(2)        | 133.8         | 1 -x, 1-y. 1-z      |
|          | C(7)-H(7B)···Cl(1)   | 0.98          | 2.956(0)        | 3.741(2)        | 137.9         | 1 -x, 1-y. 1-z      |
|          | C(17)-H(17A)···Cl(1) | 0.95          | 2.902(0)        | 3.717(2)        | 144.6         | 1 -x, 1-y. 1-z      |
| <b>5</b> | O(2)-H(2)···O(1)     | 0.84          | 1.744(3)        | 2.498(3)        | 148.4         |                     |
|          | C(12)-H(12)···Cl(2)  | 0.95          | 2.911(1)        | 3.704(3)        | 141.8         | 1 -x+1,y-1/2,-z+1   |
|          | C(7)-H(7B)···Cl(2)   | 0.95          | 2.695(1)        | 3.531(3)        | 143.6         | 1-x, -0.5+y, 2-z    |
|          | C(14)-H(14A)···O(1)  | 0.98          | 2.522(2)        | 3.501(4)        | 176.4         | -x+1,y-1/2,-z       |
|          | C(14)-H(14B)···Cl(1) | 0.98          | 2.843(1)        | 3.803(4)        | 166.8         | -x+2,y-1/2,-z+1     |
|          | C(9)-H(9A)···Cl(1)   | 0.98          | 2.872(1)        | 3.749(3)        | 149.6         | -x+2,y-1/2,-z+1     |
|          | C(9)-H(9C)···Cl(1)   | 0.98          | 2.778(1)        | 3.462(3)        | 127.5         | -x+2,y-1/2,-z+1     |

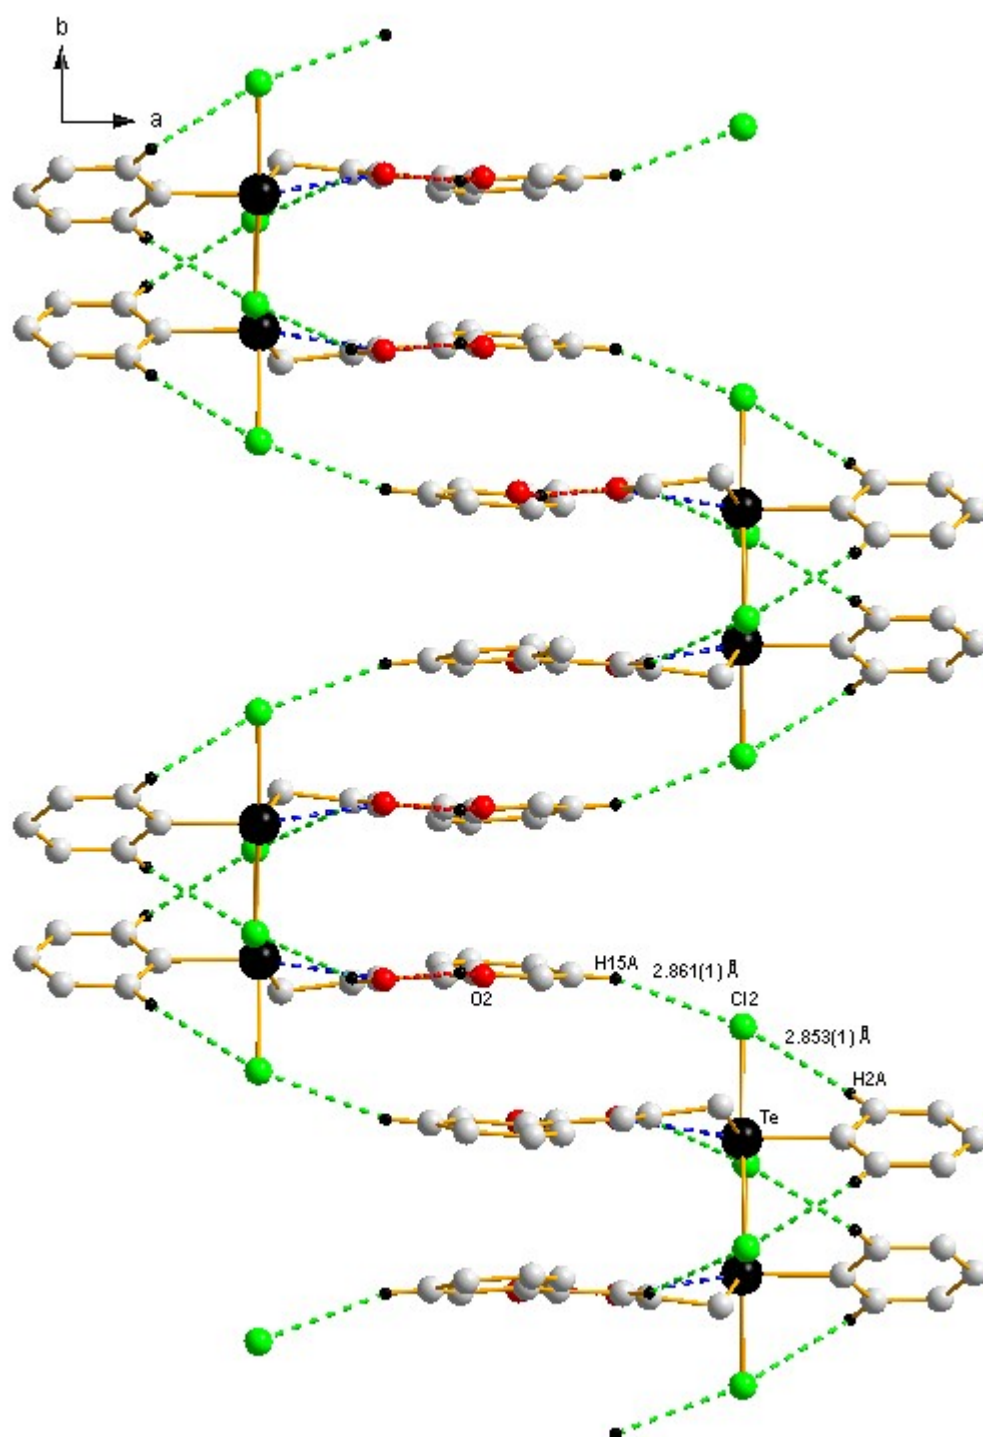

**Fig. S1** Crystal lattices of compound **1** showing helical structure through C-H...Cl (green) hydrogen bonding interactions.

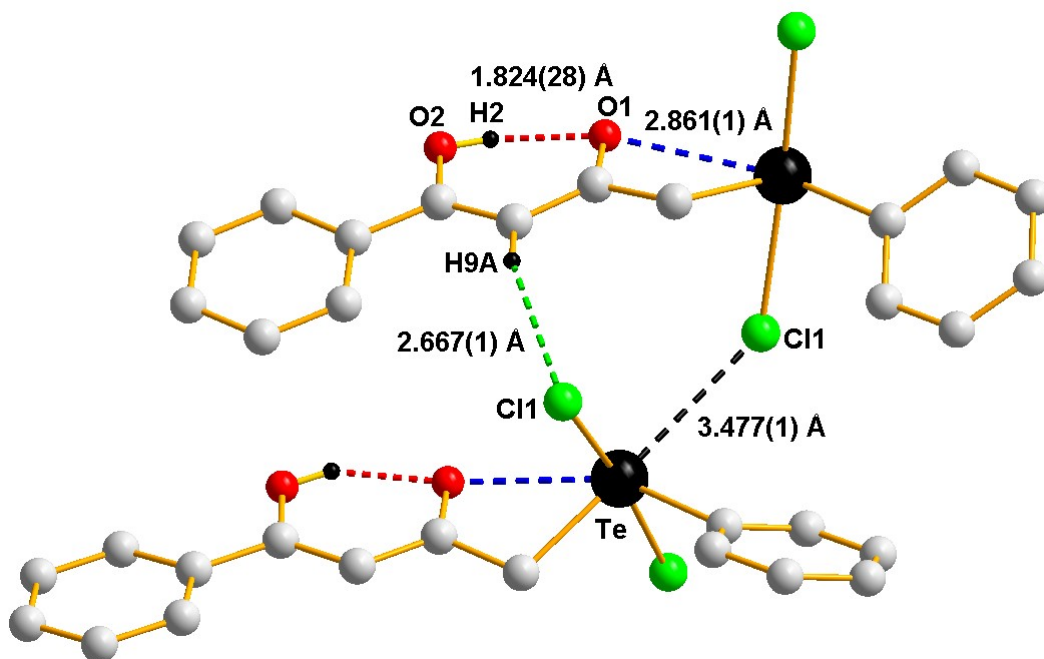

**Fig. S2** Crystal lattices of compound **1** showing O-H---O (red), C-H---Cl and (green) hydrogen bonding interactions and Te---O (blue) & Te---Cl (black) secondary bonding interaction.

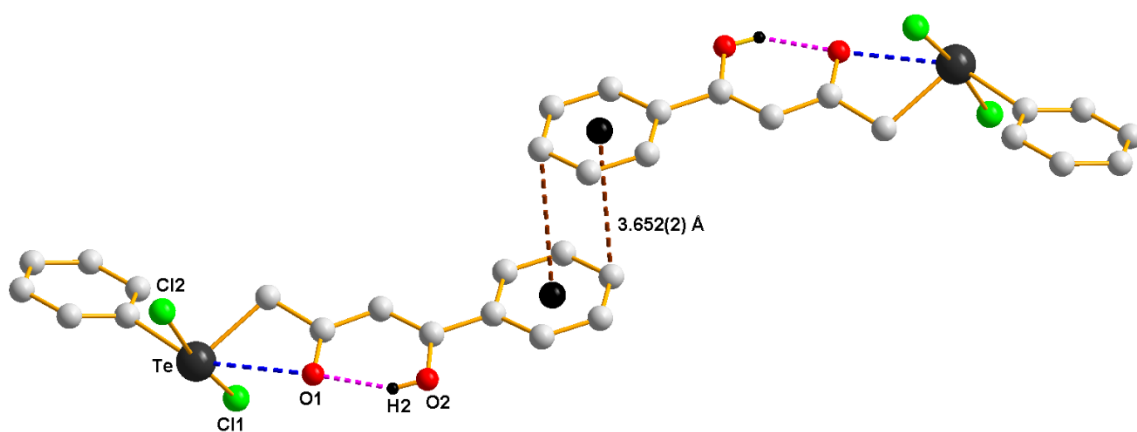

**Fig. S3** Crystal lattices of compound **1** showing  $\pi$ --- $\pi$  (brown) interaction.

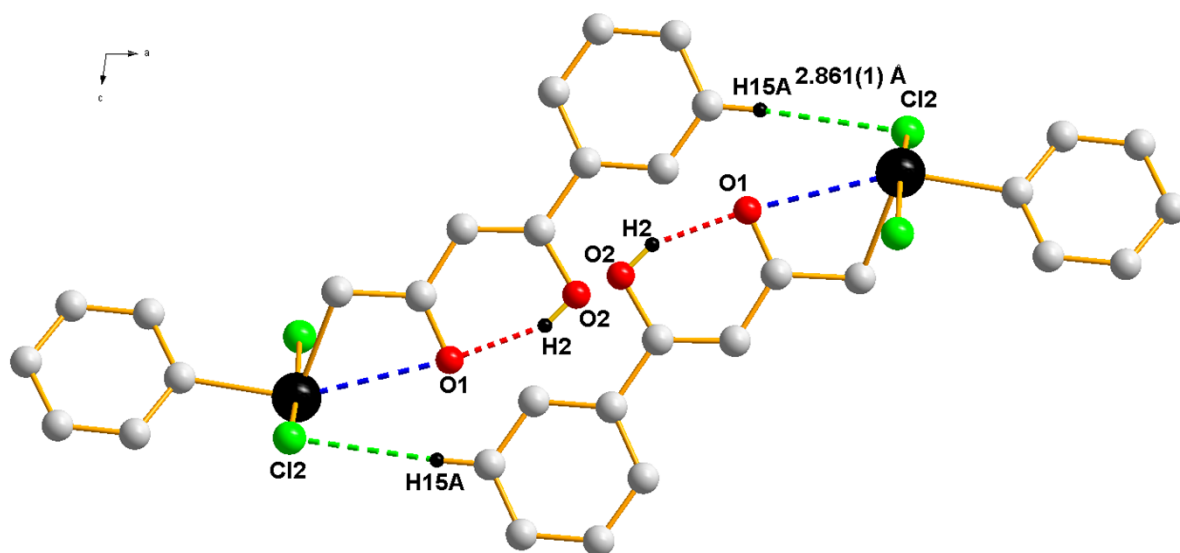

**Fig. S4.** Centrosymmetric dimeric unit in the crystal lattices of compound **1** through C-H...Cl (green) hydrogen bonding interactions.

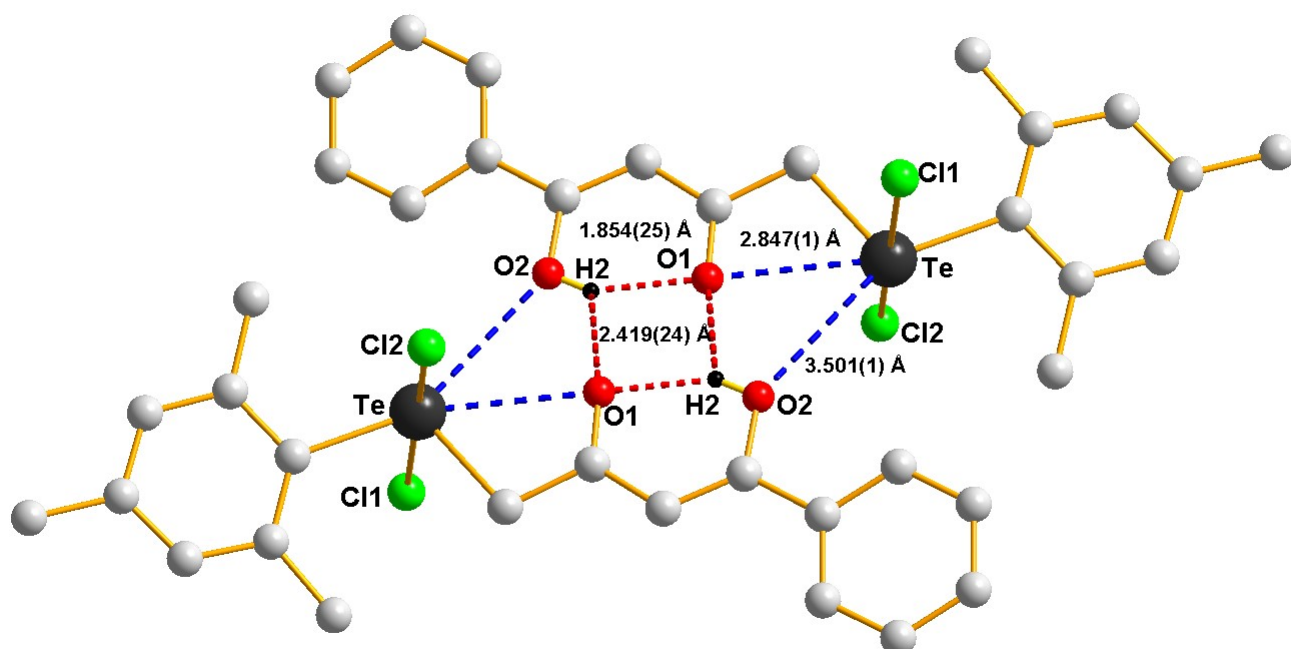

**Fig. S5.** Centrosymmetric dimeric unit in the crystal lattices of compound **4** through O-H...O (purple) hydrogen bonding interactions, Te...O (blue) secondary bonding interaction.



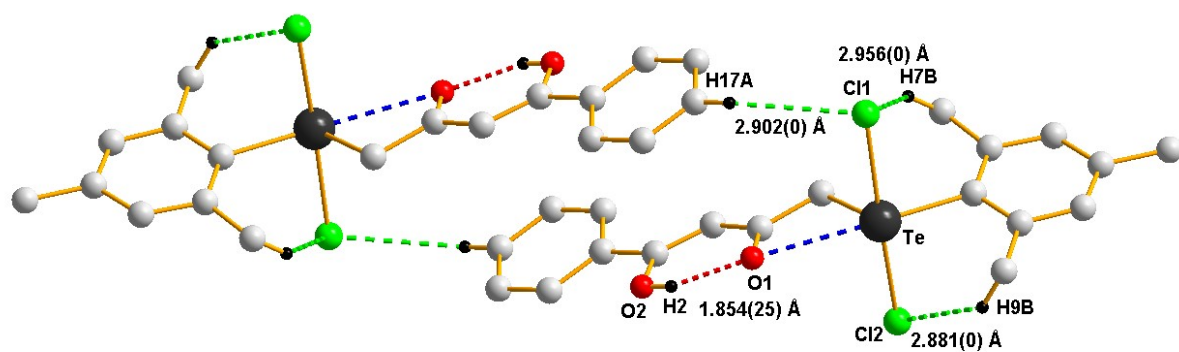

**Fig. S6.** Centrosymmetric dimeric unit in the crystal lattices of compound **4** through C-H...Cl (green) hydrogen bonding interactions.

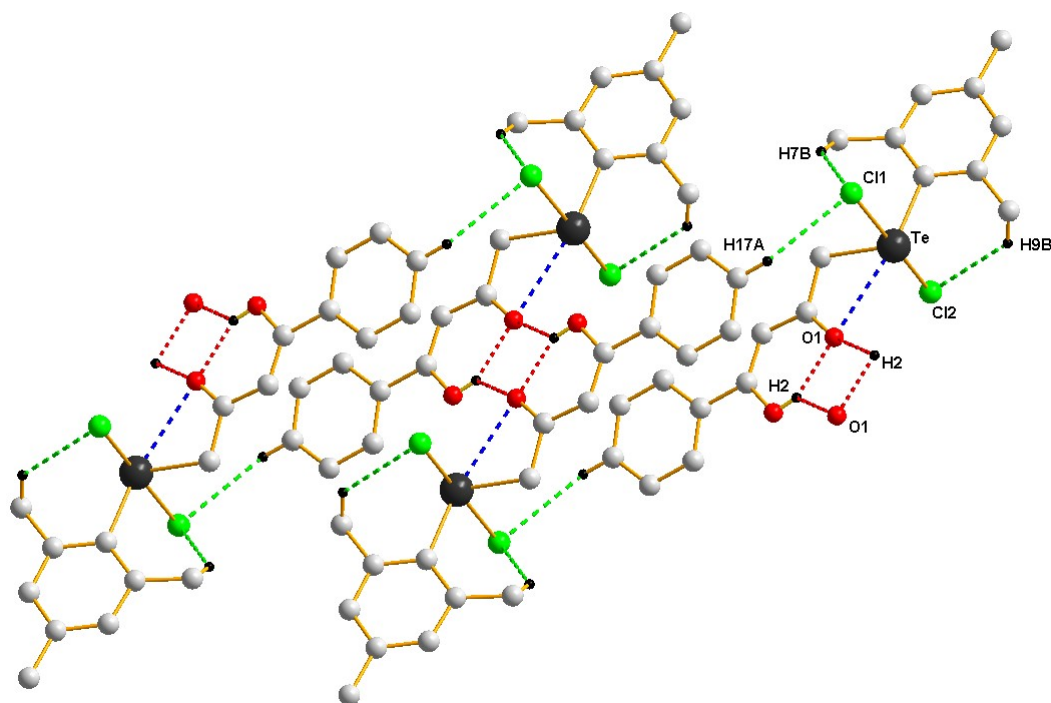

**Fig. S7.** Supramolecular architecture along *c* axis of compound **4**.

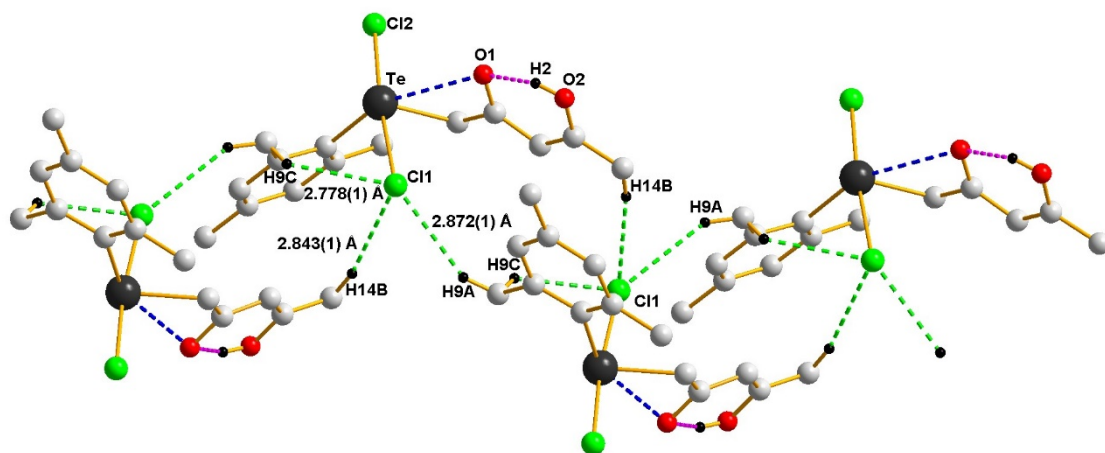

**Fig. S8.** Supramolecular architectures in the crystal lattices of compound **5** through O-H...O (purple) and C-H...Cl (green) hydrogen bonding interactions and Te...O (blue) secondary bonding interaction.

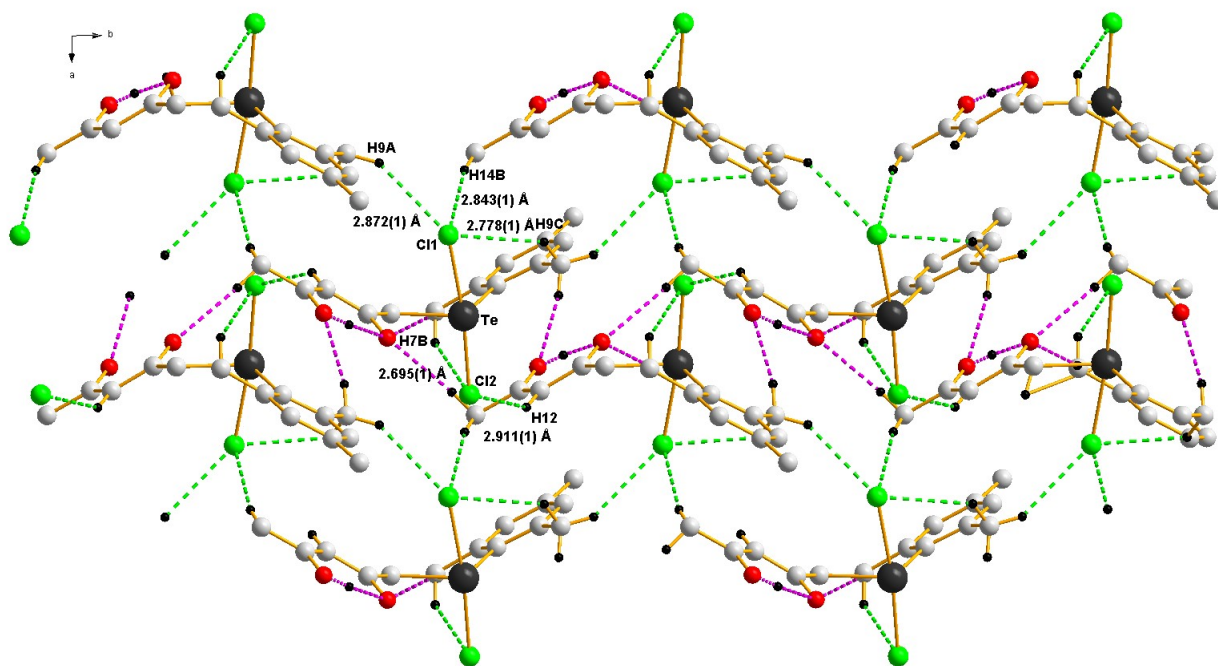

**Fig. S9.** Supramolecular architectures in the crystal lattices of compound **5** through O-H...O (purple) and C-H...Cl (green) hydrogen bonding interactions.

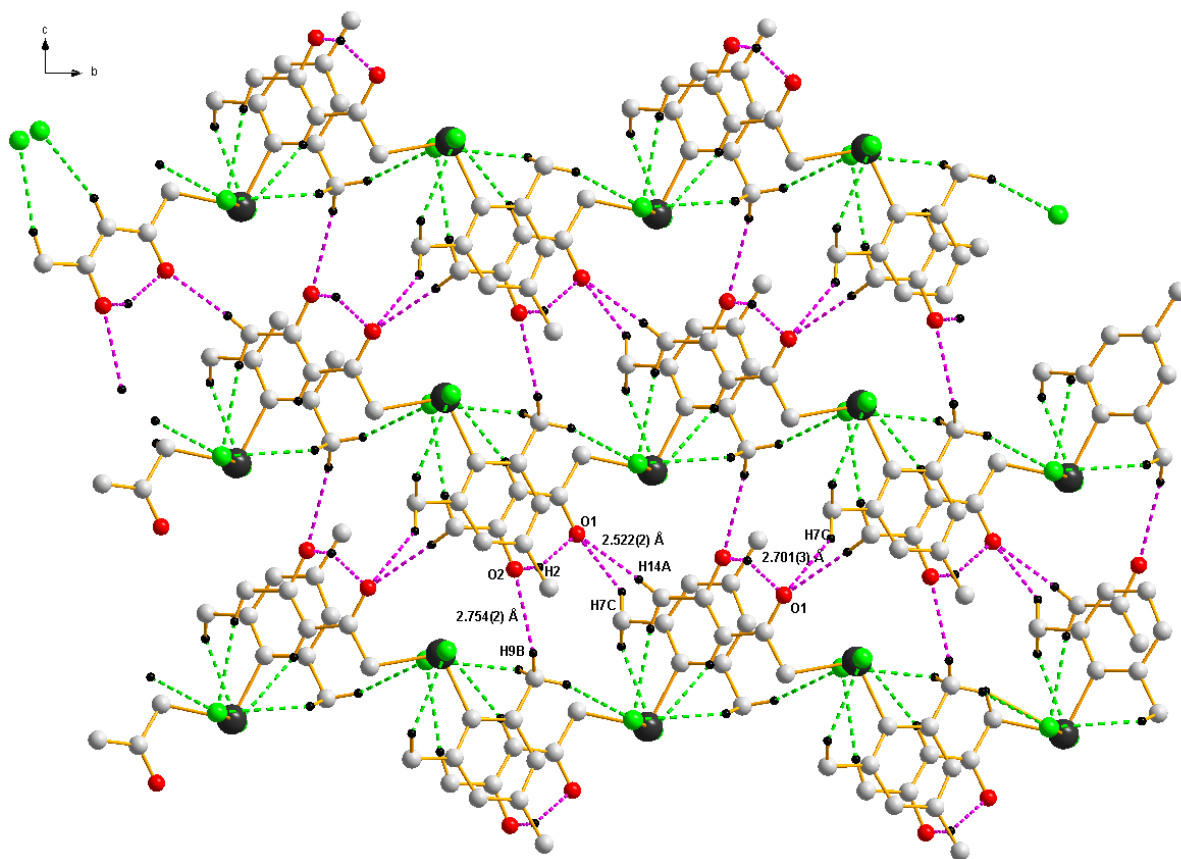

**Fig. S10.** Supramolecular architectures in the crystal lattices of compound **5** through O-H...O (purple) and C-H...Cl (green) hydrogen bonding interactions.

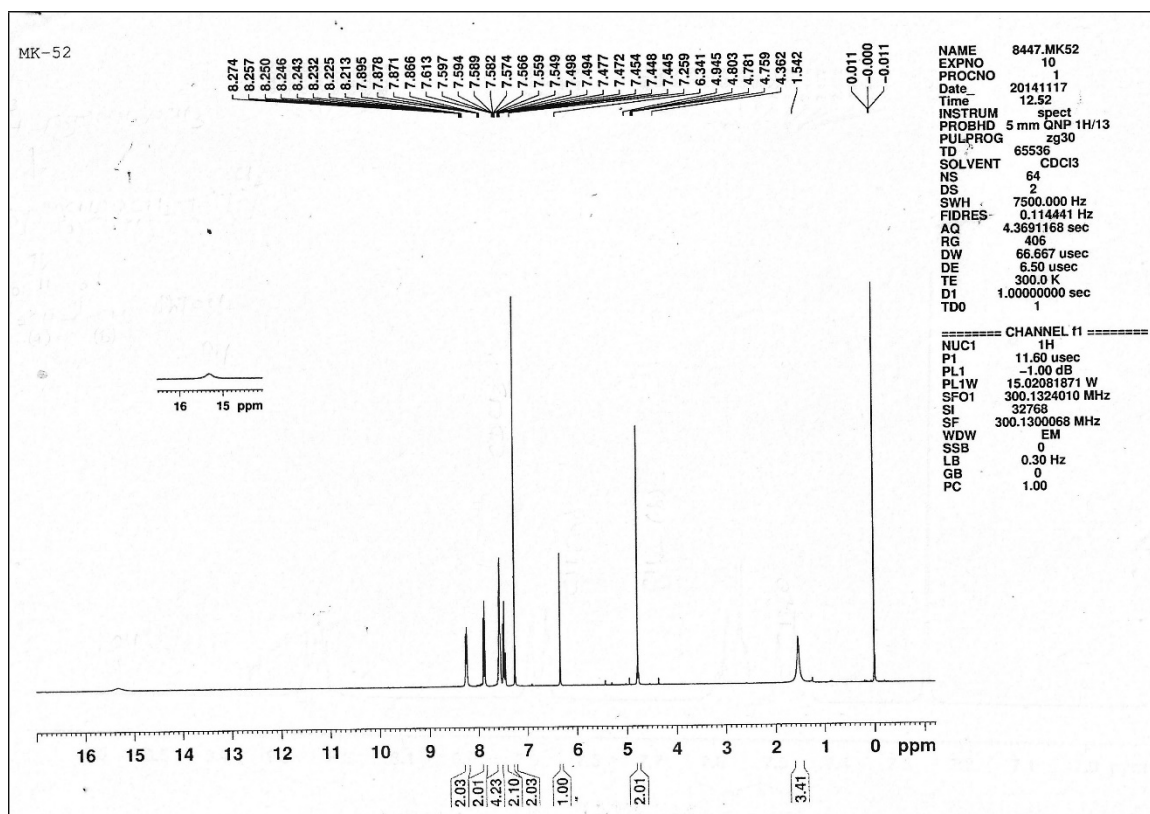

**Fig. S11.**  $^1\text{H}$  NMR spectrum of compound  $\text{Ph}[\text{PhC}(\text{OH})\text{CHC}(\text{O})\text{CH}_2]\text{TeCl}_2$  (**1**) in  $\text{CDCl}_3$ .

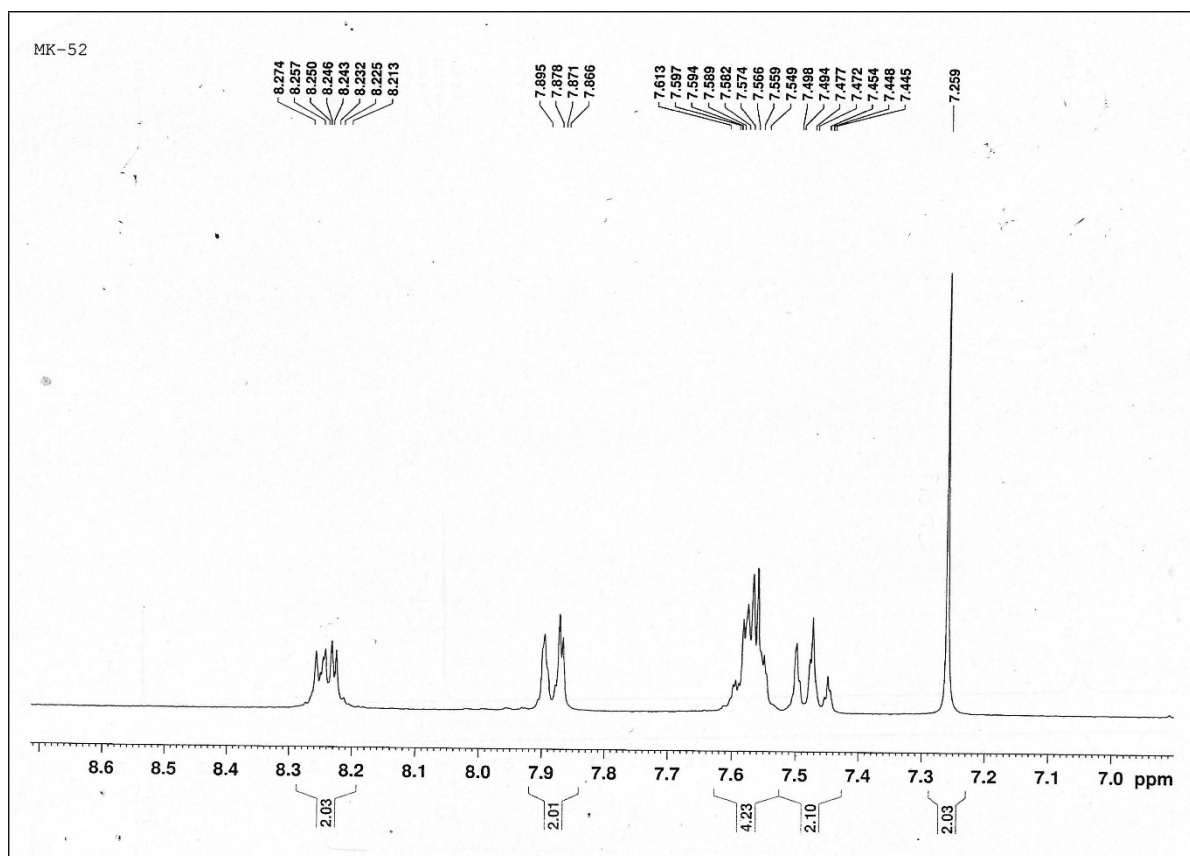

**Fig. S12.** Expanded aryl region of  $^1\text{H}$  NMR spectrum of compound  $\text{Ph}[\text{PhC}(\text{OH})\text{CHC}(\text{O})\text{CH}_2]\text{TeCl}_2$  (**1**) in  $\text{CDCl}_3$ .

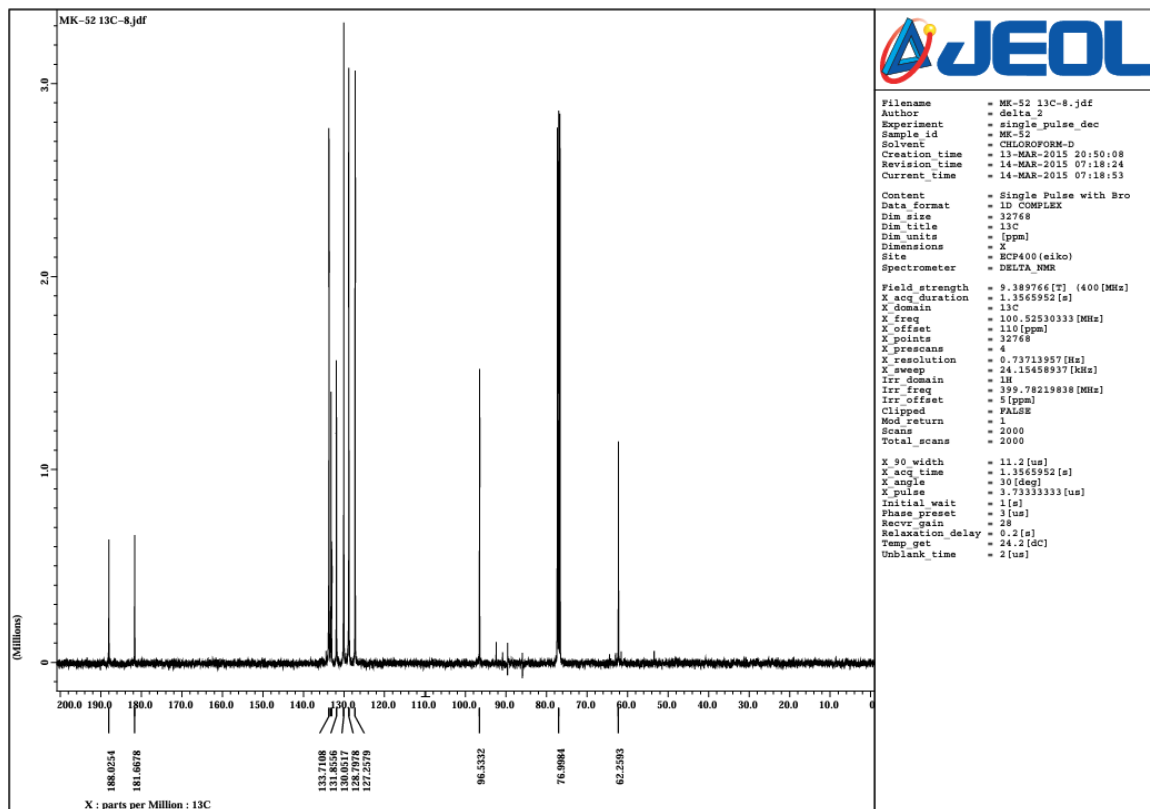

**Fig. S13.**  $^{13}\text{C}$  NMR spectrum of compound  $\text{Ph}[\text{PhC}(\text{OH})\text{CHC}(\text{O})\text{CH}_2]\text{TeCl}_2$  (**1**) in  $\text{CDCl}_3$ .

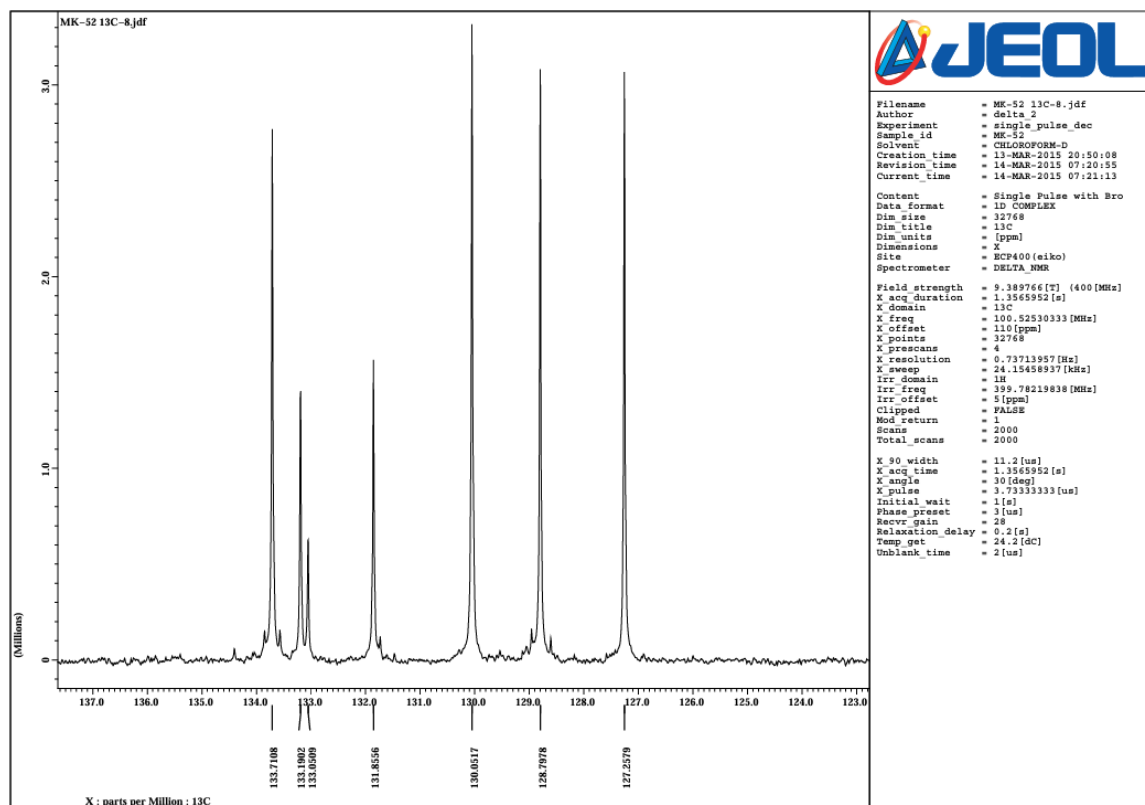

**Fig. S14.** Expanded aryl region of  $^{13}\text{C}$  NMR spectrum of compound  $\text{Ph}[\text{PhC}(\text{OH})\text{CHC}(\text{O})\text{CH}_2]\text{TeCl}_2$  (**1**) in  $\text{CDCl}_3$ .

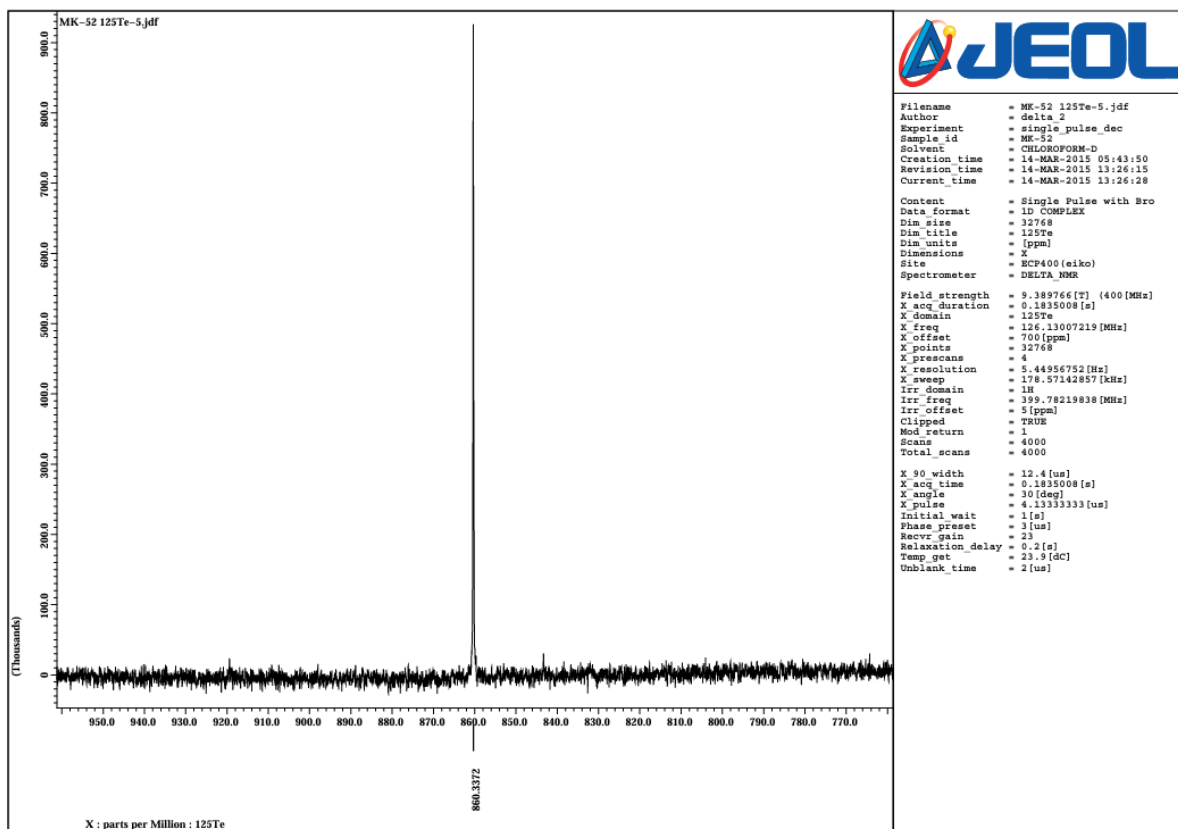

**Fig. S15.**  $^{125}\text{Te}$  NMR spectrum of compound  $\text{Ph}[\text{PhC}(\text{OH})\text{CHC}(\text{O})\text{CH}_2]\text{TeCl}_2$  (**1**) in  $\text{CDCl}_3$ .



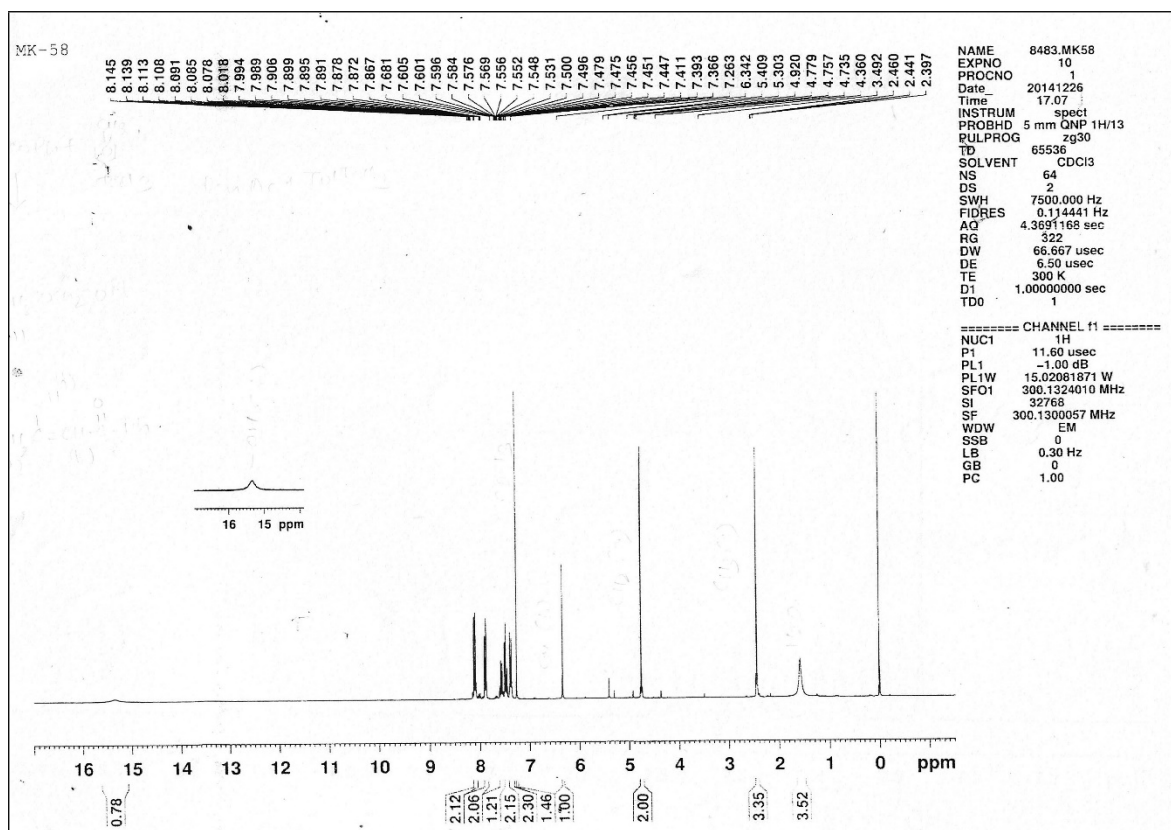

**Fig. S16.**  $^1\text{H}$  NMR spectrum of compound  $p\text{-Tol}[\text{PhC}(\text{OH})\text{CHC}(\text{O})\text{CH}_2]\text{TeCl}_2$  (**2**) in  $\text{CDCl}_3$ .

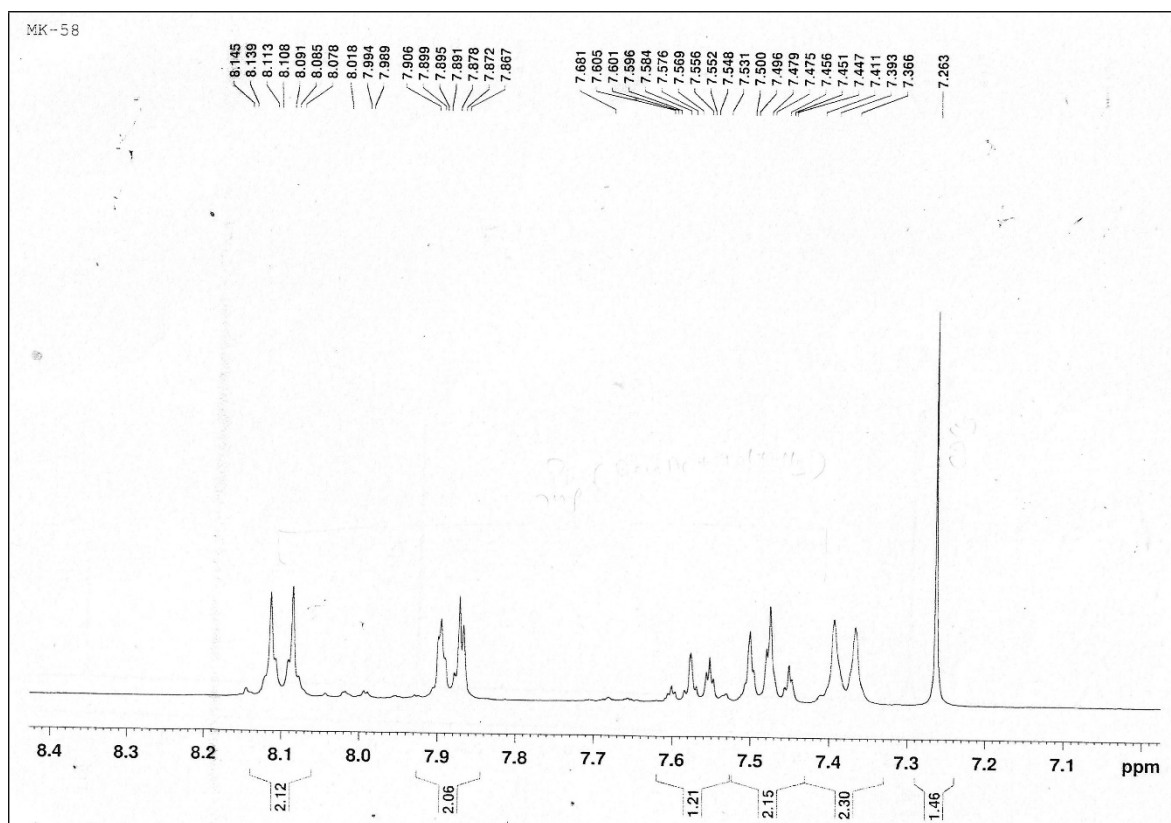

**Fig. S17.** Expanded aryl region of  $^1\text{H}$  NMR spectrum of compound *p*-Tol[PhC(OH)CHC(O)CH<sub>2</sub>]TeCl<sub>2</sub> (**2**) in CDCl<sub>3</sub>.

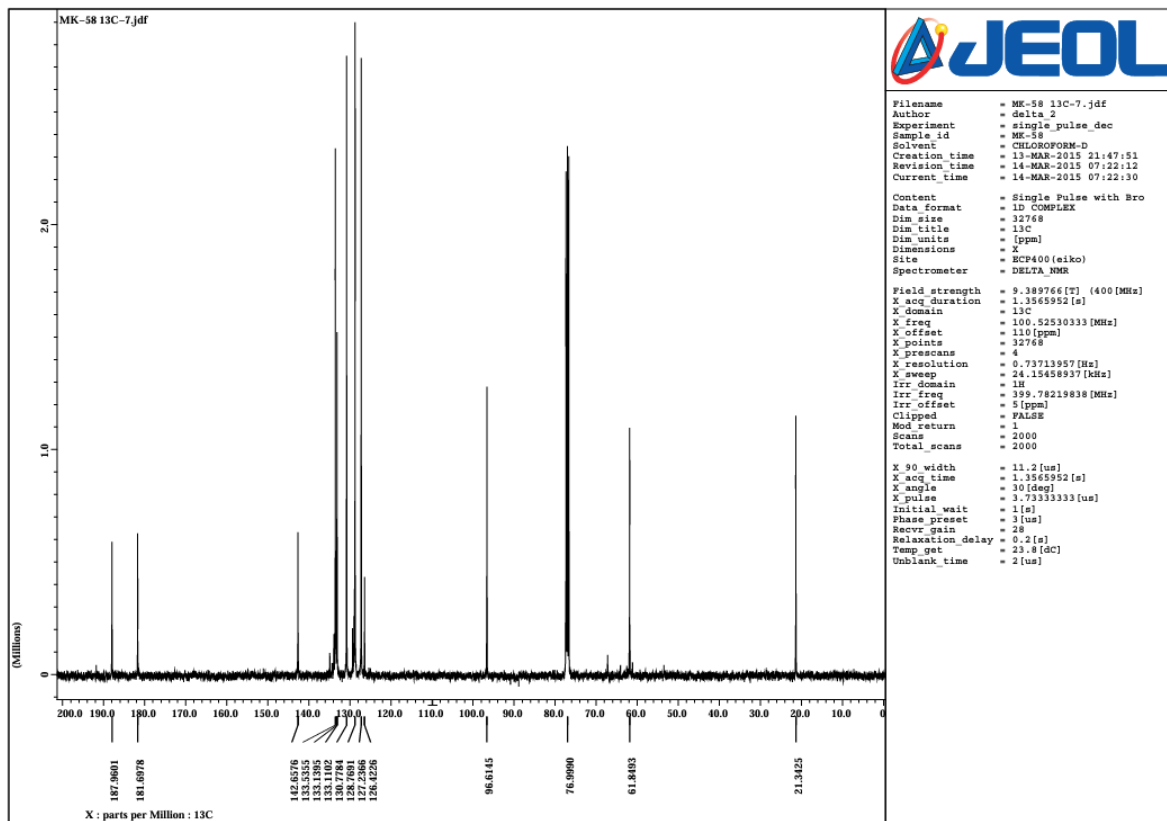

Fig. S18.  $^{13}\text{C}$  NMR spectrum of compound  $p\text{-Tol}[\text{PhC}(\text{OH})\text{CHC}(\text{O})\text{CH}_2]\text{TeCl}_2$  (**2**) in  $\text{CDCl}_3$ .

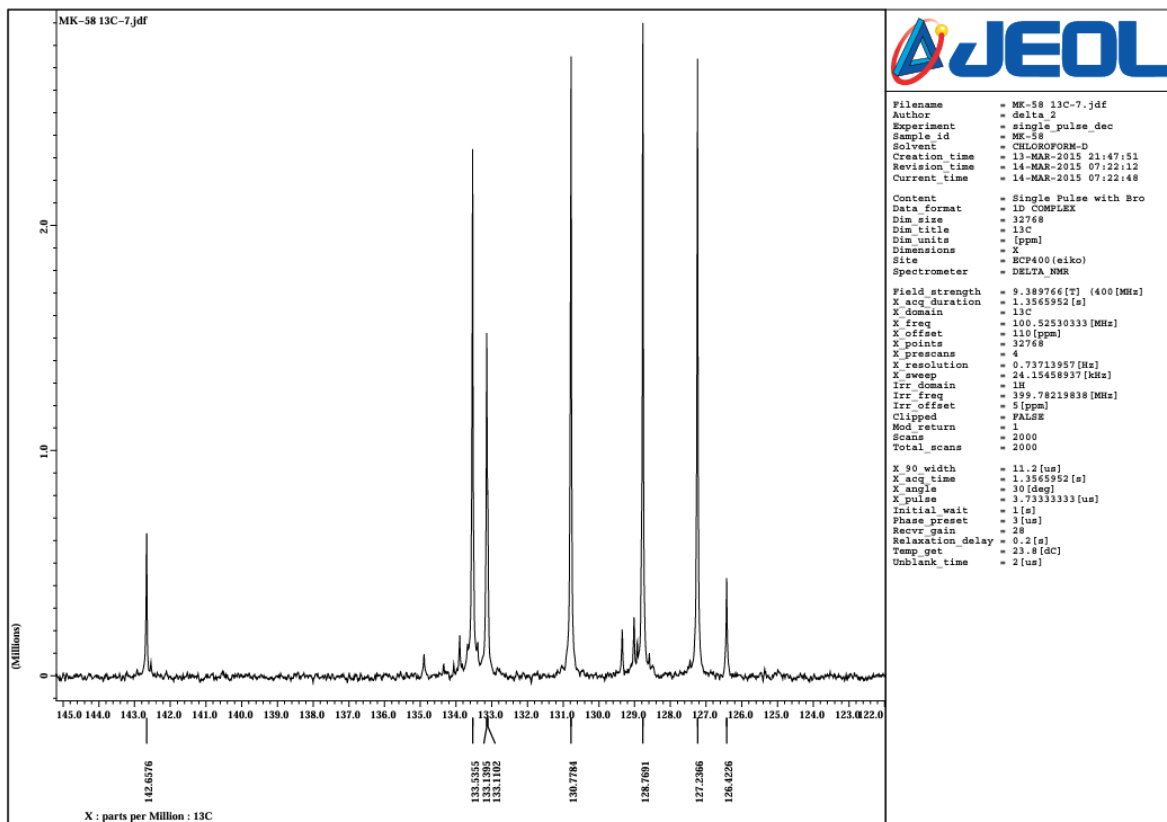

**Fig. S19.** Expanded aryl region of  $^{13}\text{C}$  NMR spectrum of compound *p*-Tol[PhC(OH)CHC(O)CH<sub>2</sub>]TeCl<sub>2</sub> (**2**) in CDCl<sub>3</sub>.

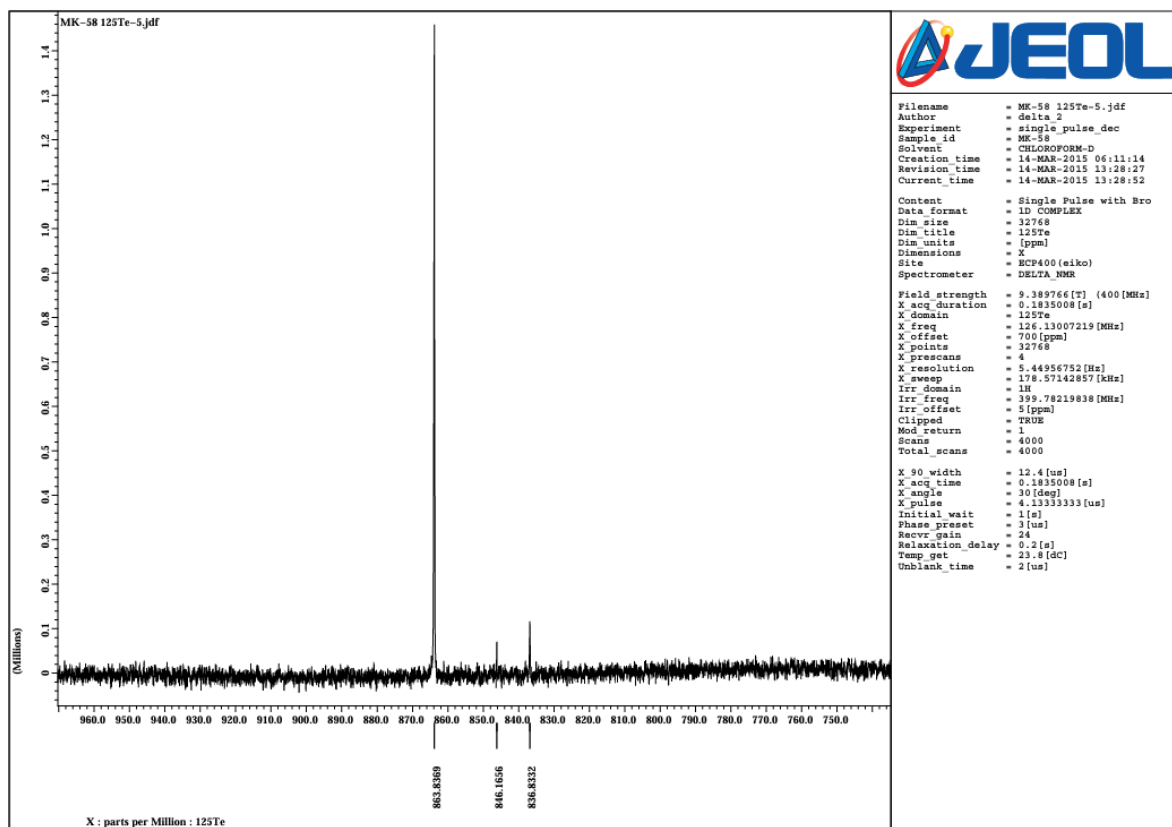

**Fig. S20.**  $^{125}\text{Te}$  NMR spectrum of compound *p*-Tol[PhC(OH)CHC(O)CH<sub>2</sub>]TeCl<sub>2</sub> (**2**) in CDCl<sub>3</sub>.

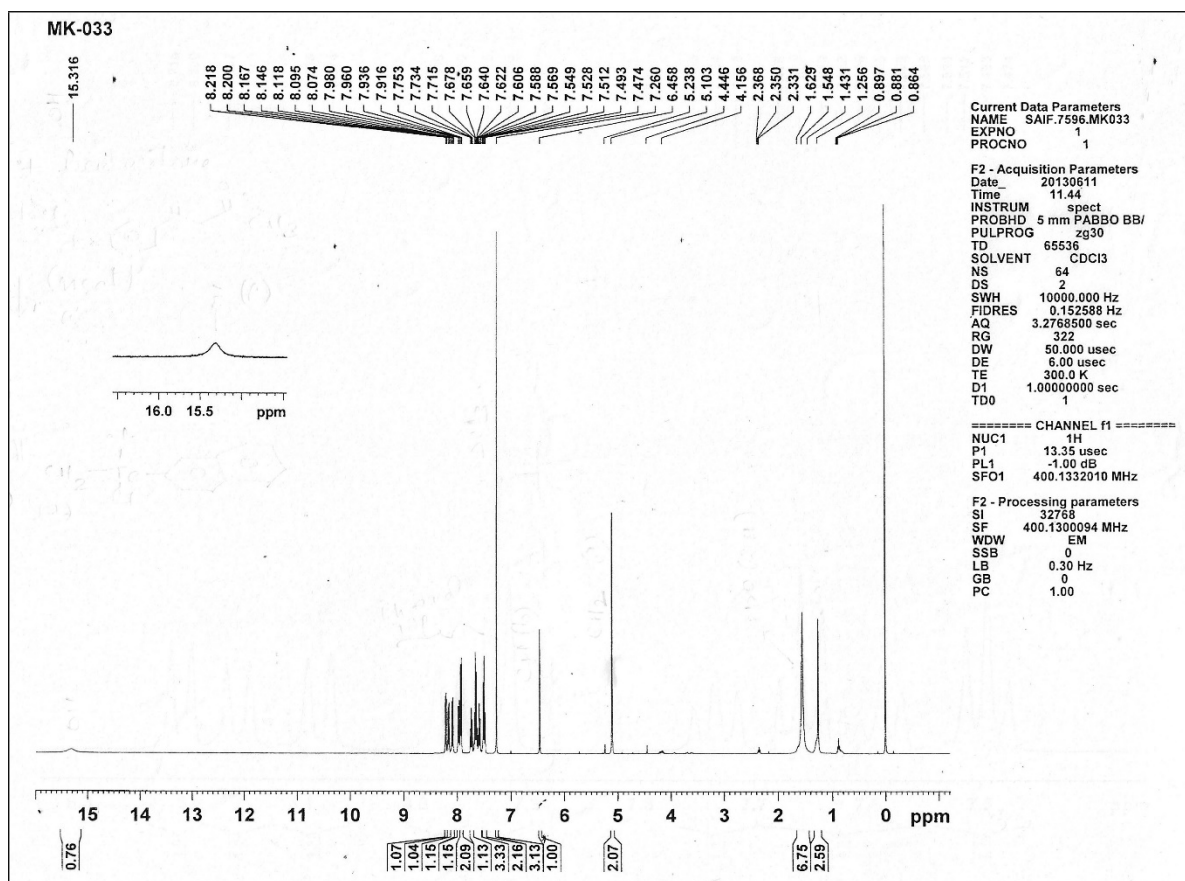

Fig. S21.  $^1\text{H}$  NMR spectrum of compound *l*-Nap[PhC(OH)CHC(O)CH<sub>2</sub>]TeCl<sub>2</sub> (**3**) in CDCl<sub>3</sub>.

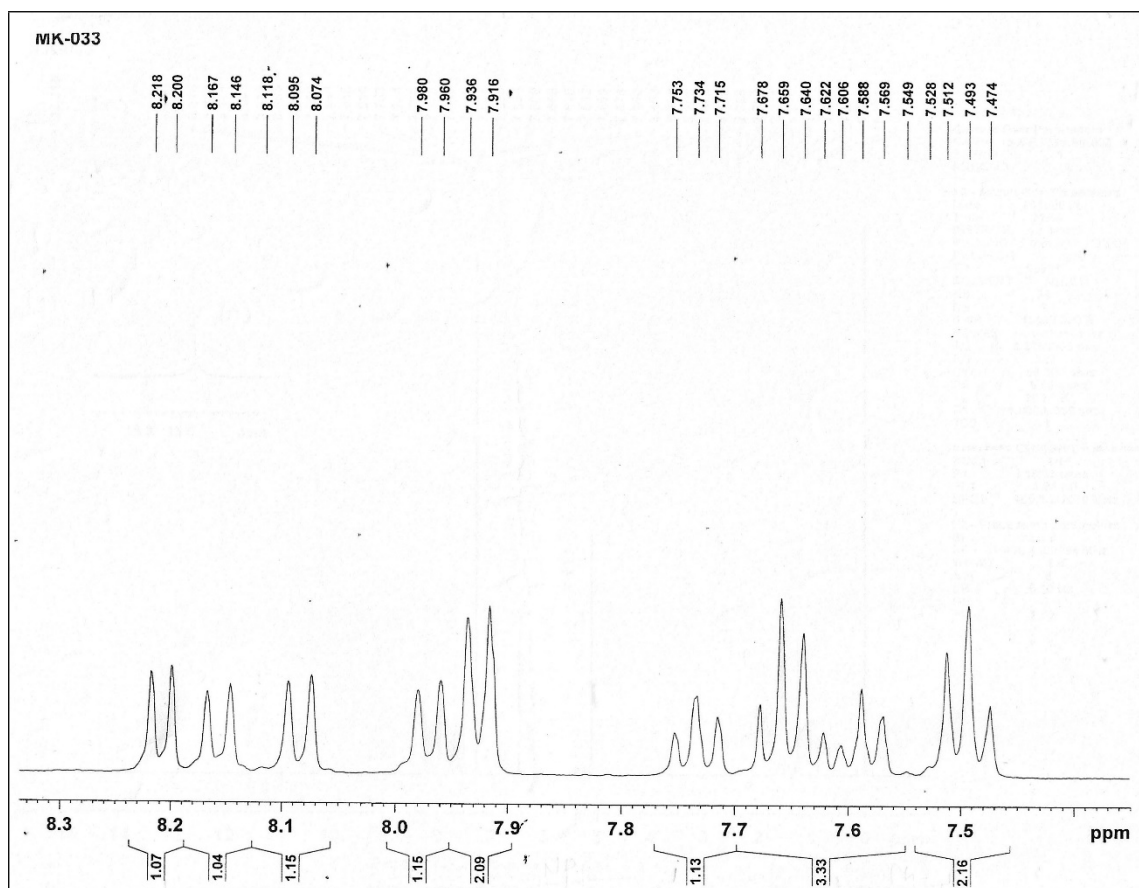

**Fig. S22.** Expanded aryl region of  $^1\text{H}$  NMR spectrum of compound *1*-Nap[PhC(OH)CHC(O)CH<sub>2</sub>]TeCl<sub>2</sub> (**3**) in CDCl<sub>3</sub>.

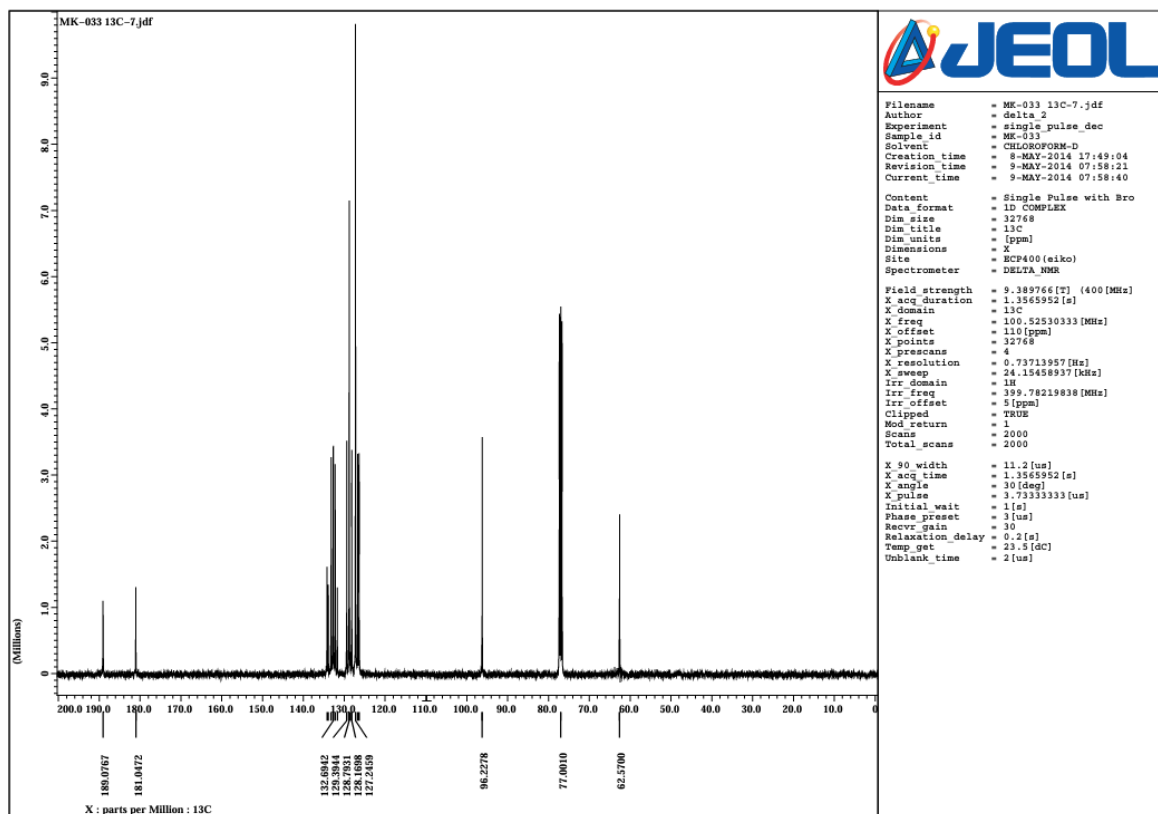

**Fig. S23.**  $^{13}\text{C}$  NMR spectrum of compound *1*-Nap[PhC(OH)CHC(O)CH<sub>2</sub>]<sub>2</sub>TeCl<sub>2</sub> (**3**) in CDCl<sub>3</sub>.



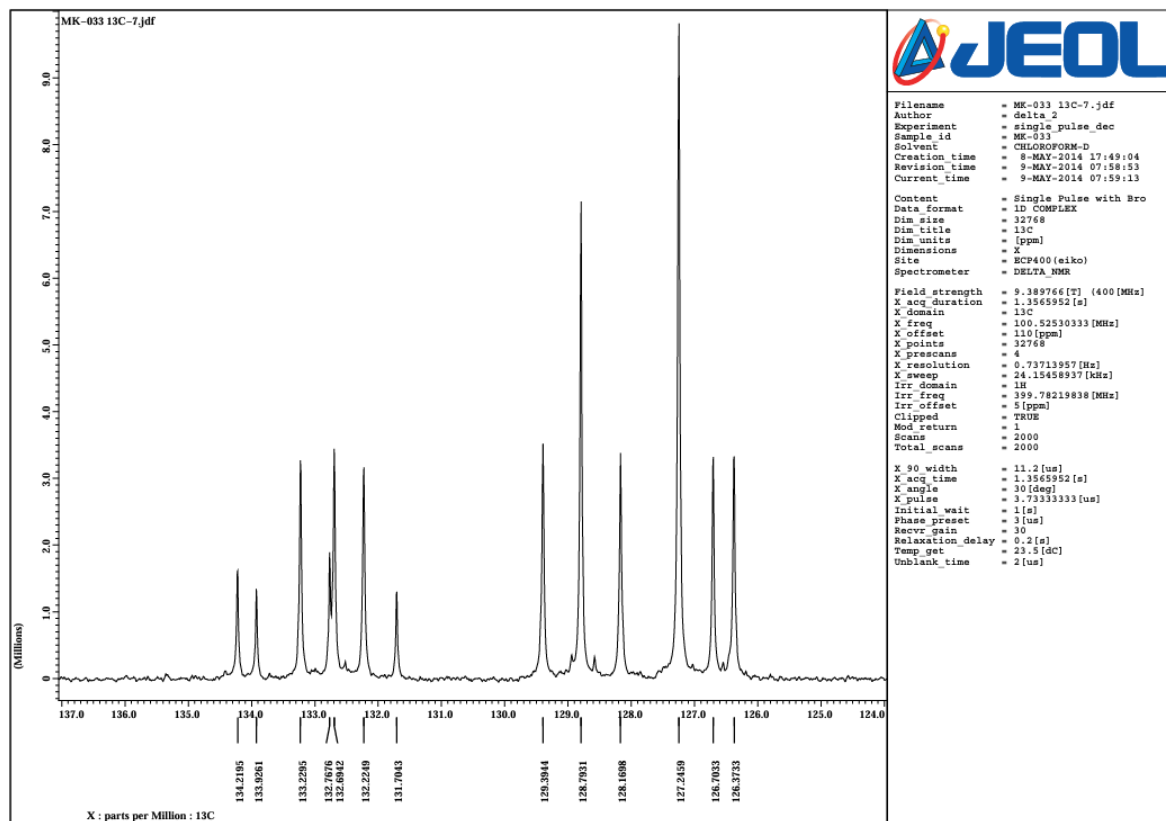

**Fig. S24.** Expanded aryl region of  $^{13}\text{C}$  NMR spectrum of compound *l*-Nap[PhC(OH)CHC(O)CH<sub>2</sub>]TeCl<sub>2</sub> (**3**) in CDCl<sub>3</sub>.

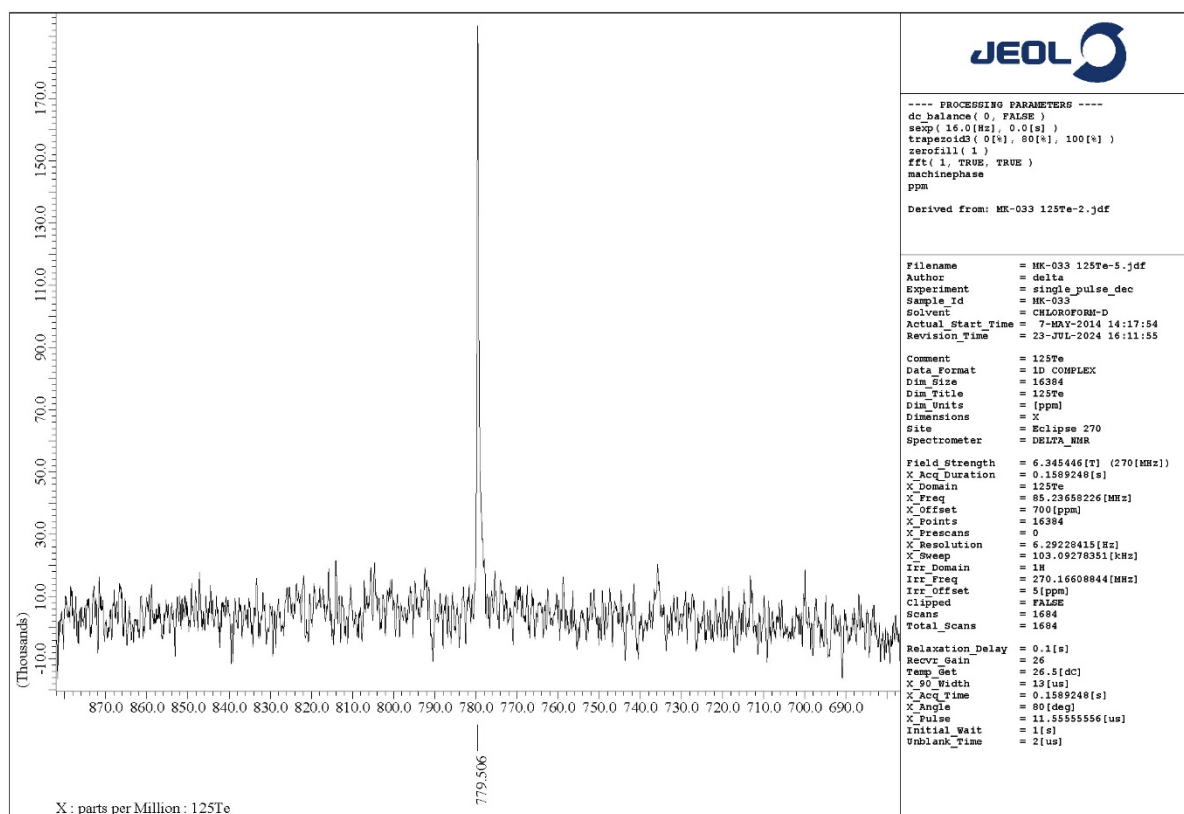

**Fig. S25.**  $^{125}\text{Te}$  NMR spectrum of compound *l*-Nap[PhC(OH)CHC(O)CH<sub>2</sub>]<sub>2</sub>TeCl<sub>2</sub> (**3**) in CDCl<sub>3</sub>.

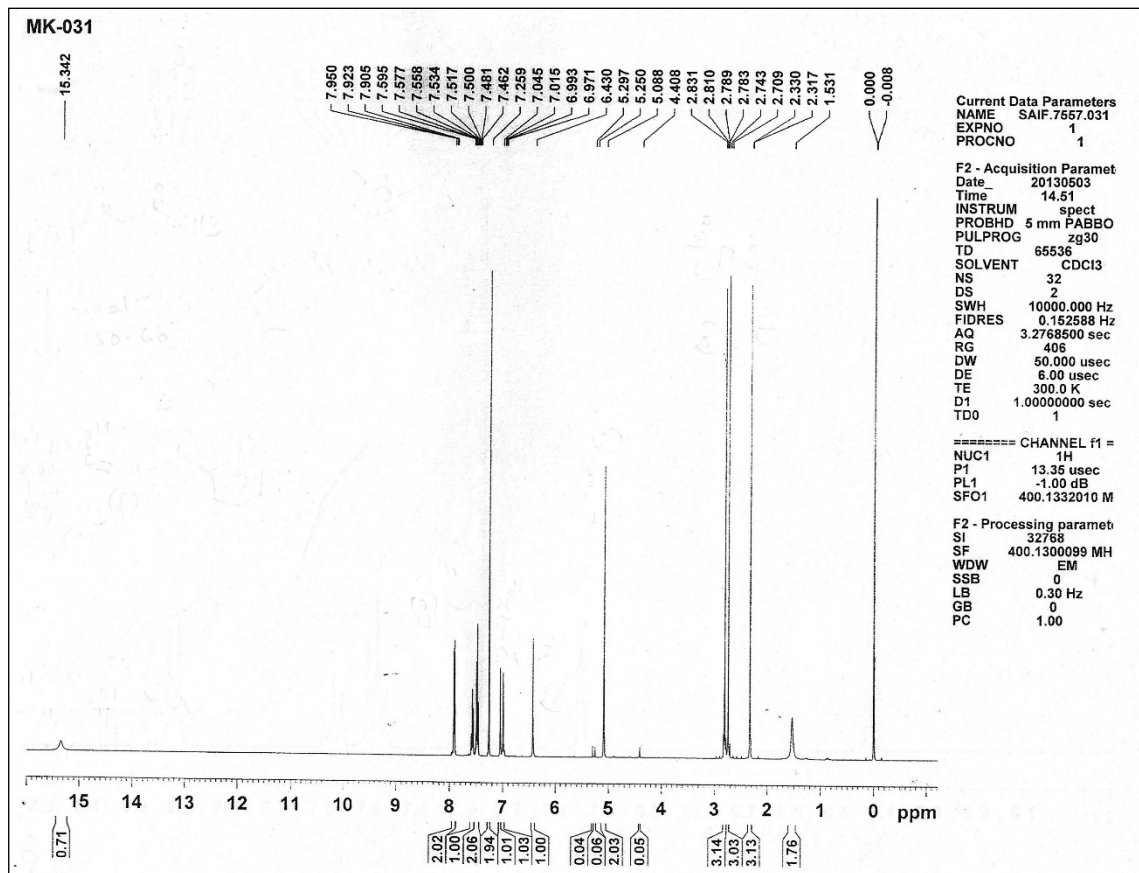

Fig. S26.  $^1\text{H}$  NMR spectrum of compound  $\text{Mes}[\text{PhC}(\text{OH})\text{CHC}(\text{O})\text{CH}_2]\text{TeCl}_2$  (4).

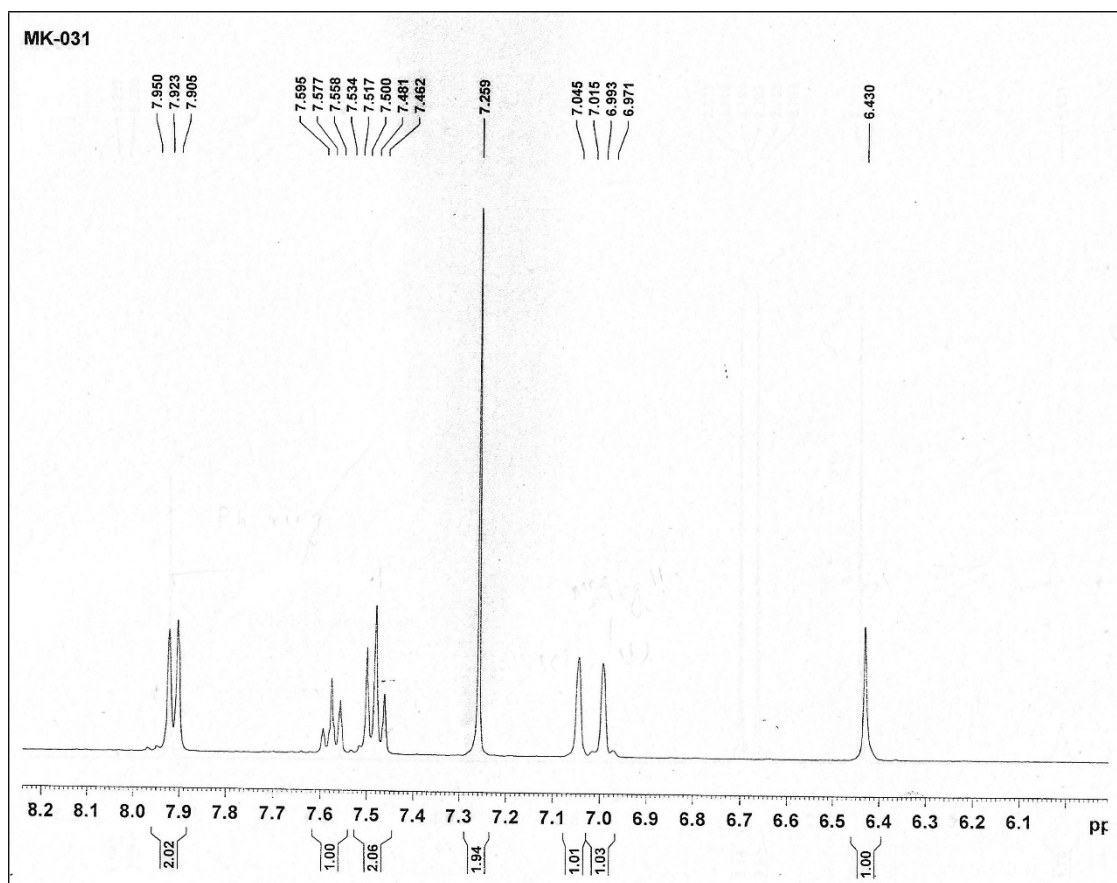

**Fig. S27.** Expanded aryl region of  $^1\text{H}$  NMR spectrum of compound  $\text{Mes}[\text{PhC}(\text{OH})\text{CHC}(\text{O})\text{CH}_2]\text{TeCl}_2$  (**4**).

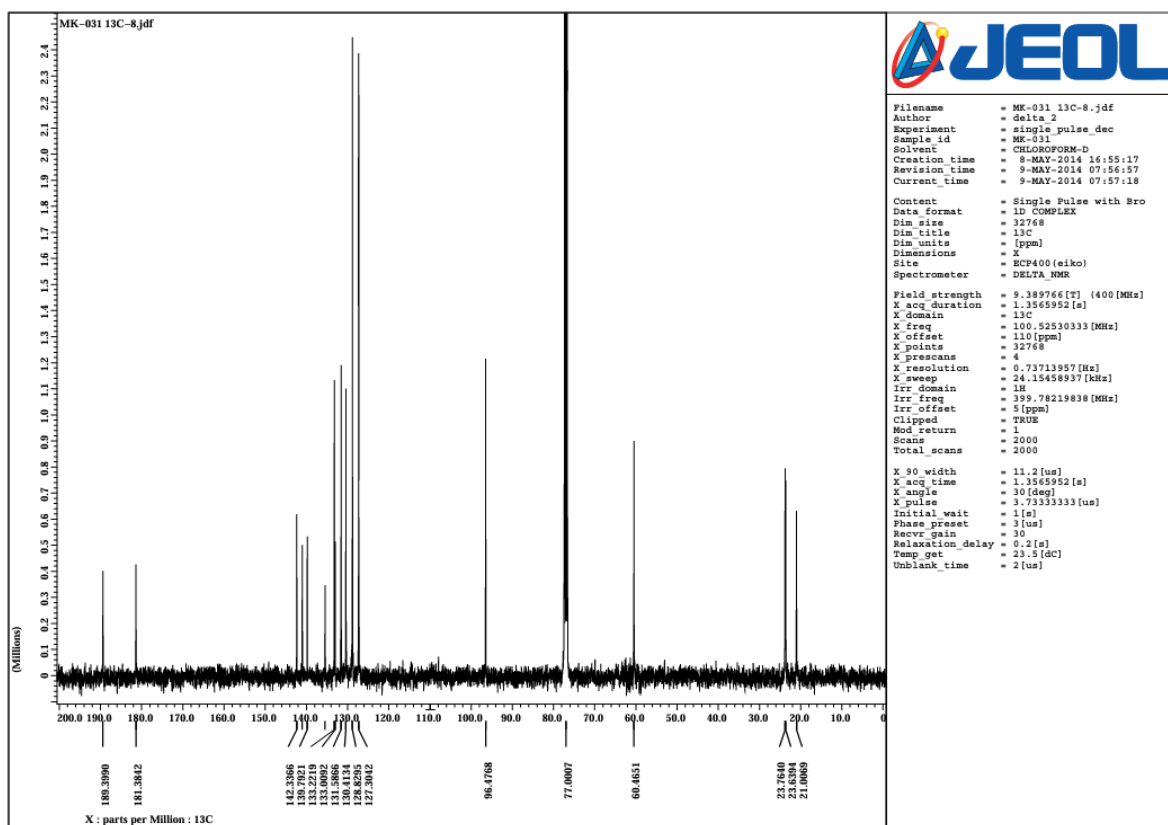

Fig. S28.  $^{13}\text{C}$  NMR spectrum of compound  $\text{Mes}[\text{PhC}(\text{OH})\text{CHC}(\text{O})\text{CH}_2]\text{TeCl}_2$  (**4**) in  $\text{CDCl}_3$ .

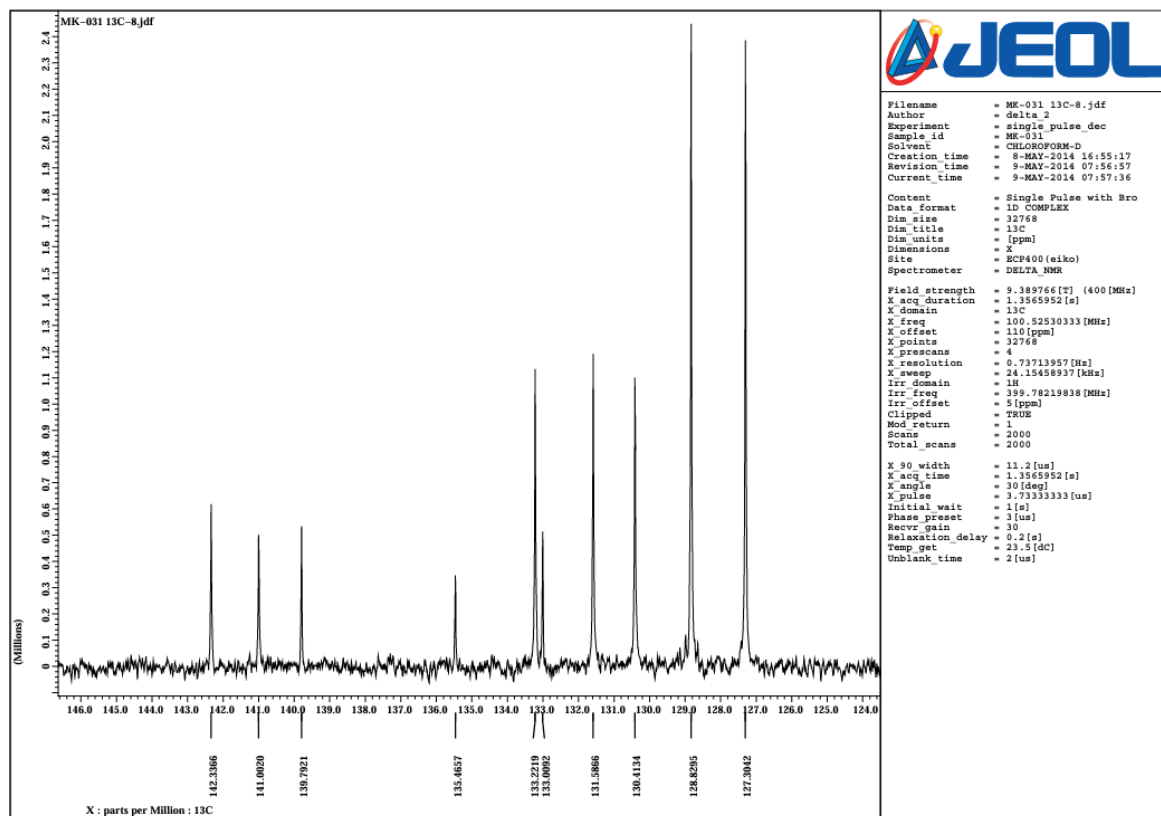

**Fig. S29.** Expanded aryl region of  $^{13}\text{C}$  NMR spectrum of compound Mes[PhC(OH)CHC(O)CH<sub>2</sub>]TeCl<sub>2</sub> (**4**) in CDCl<sub>3</sub>.

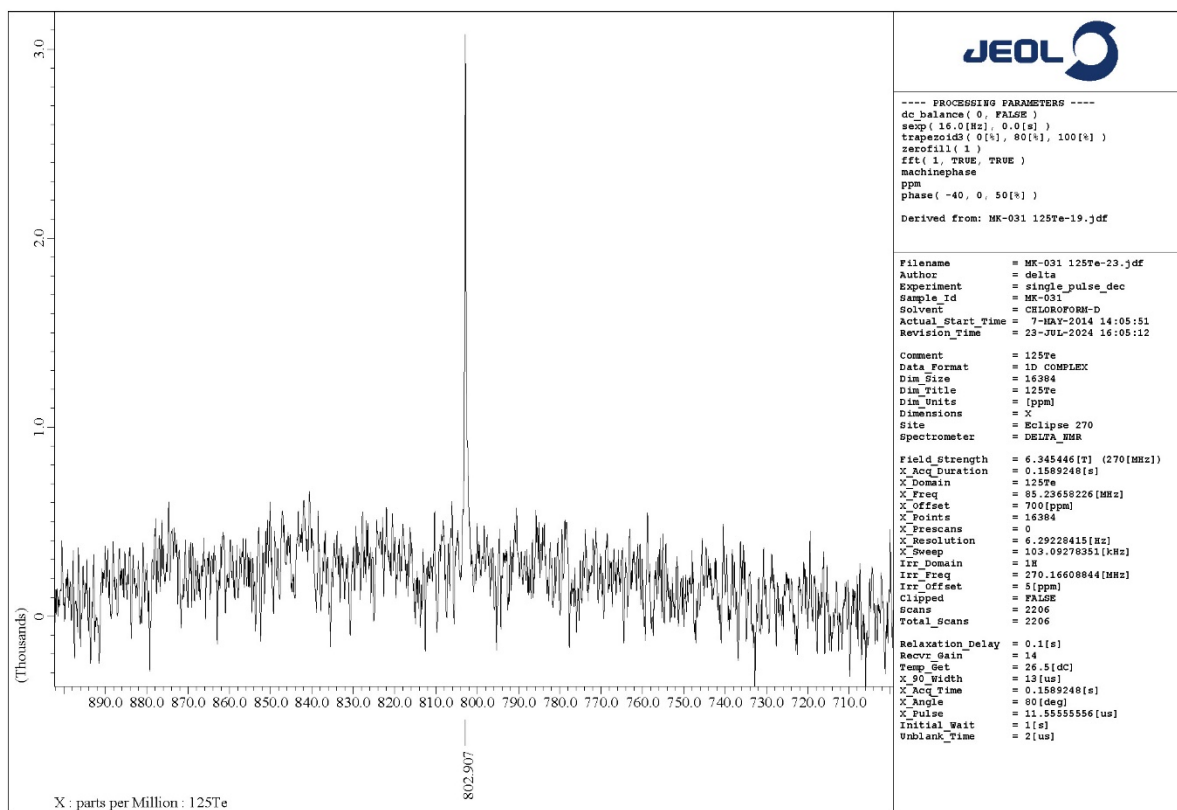

**Fig. S30.**  $^{125}\text{Te}$  NMR spectrum of compound  $\text{Mes}[\text{PhC}(\text{OH})\text{CHC}(\text{O})\text{CH}_2]\text{TeCl}_2$  (**4**) in  $\text{CDCl}_3$ .

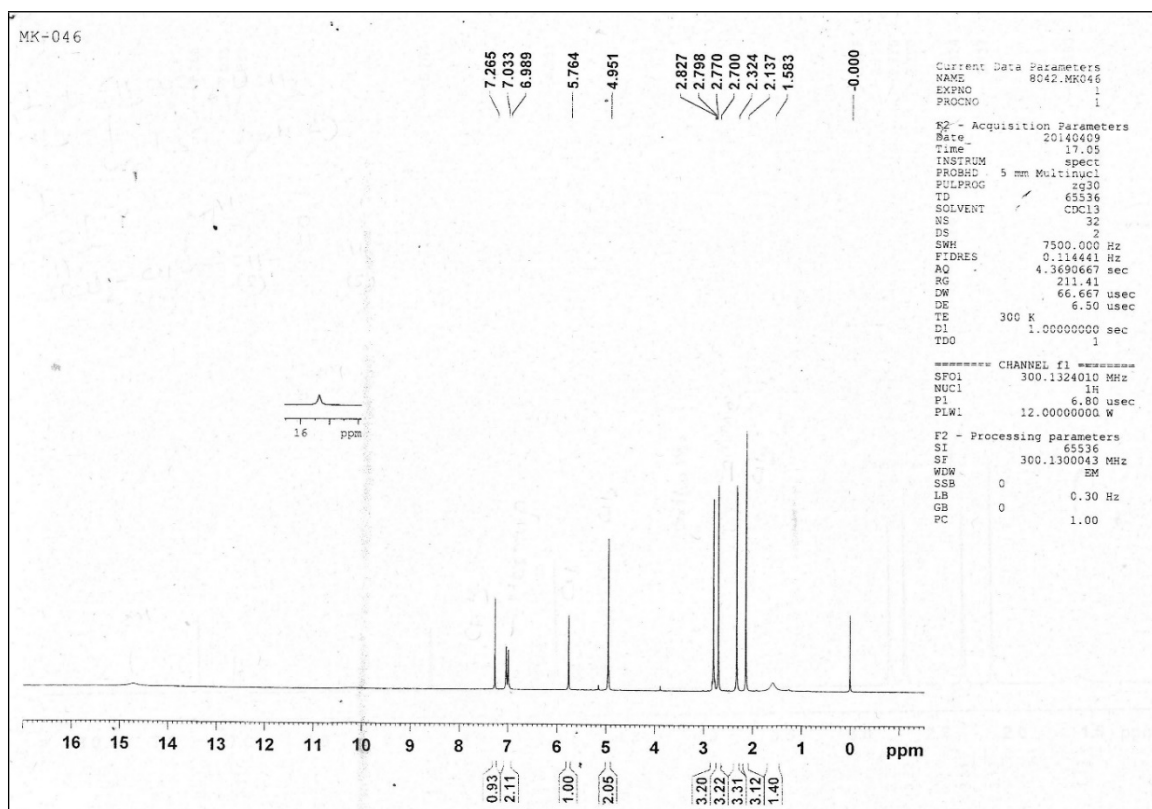

**Fig. S31.**  $^1\text{H}$  NMR spectrum of compound  $\text{Mes}[\text{CH}_3(\text{OH})\text{CHC}(\text{O})\text{CH}_2]\text{TeCl}_2$  (**5**).



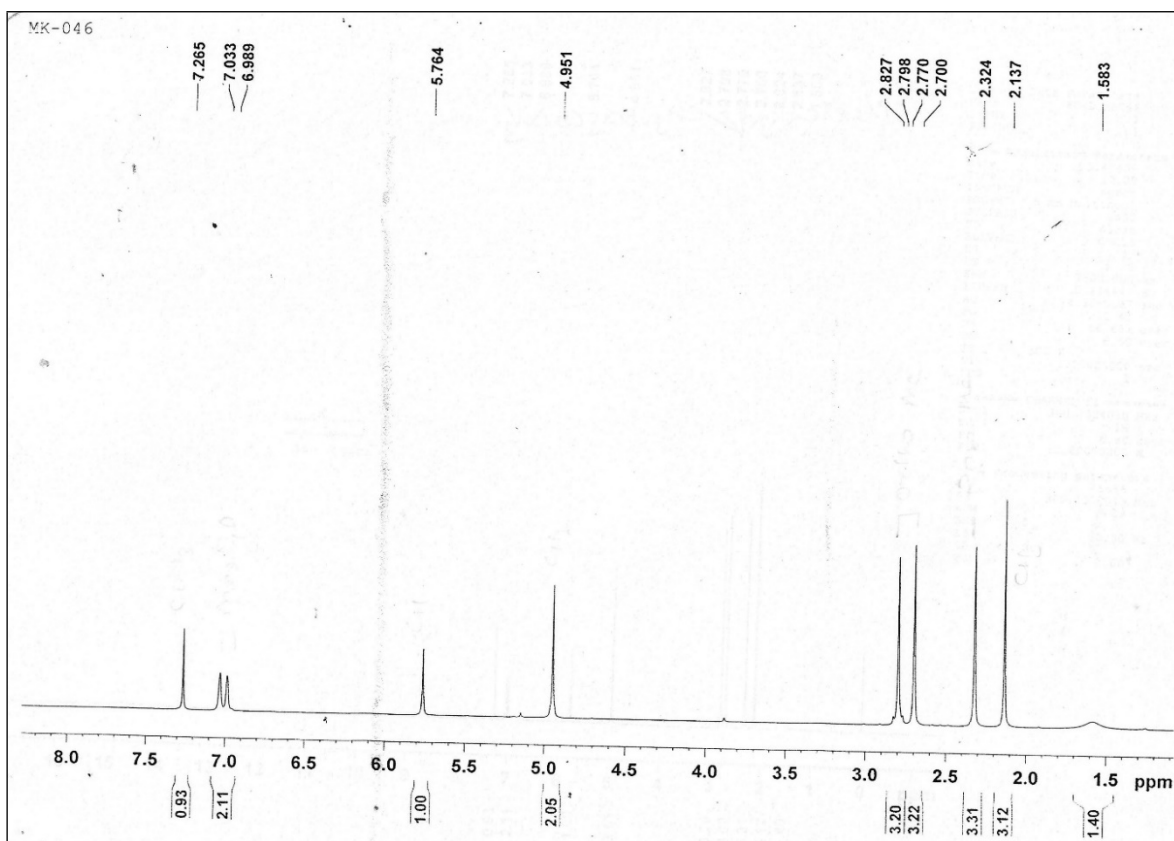

**Fig. S32.** Expanded aryl region of <sup>1</sup>H NMR spectrum of compound Mes[CH<sub>3</sub>(OH)CHC(O)CH<sub>2</sub>]<sub>2</sub>TeCl<sub>2</sub> (**5**).

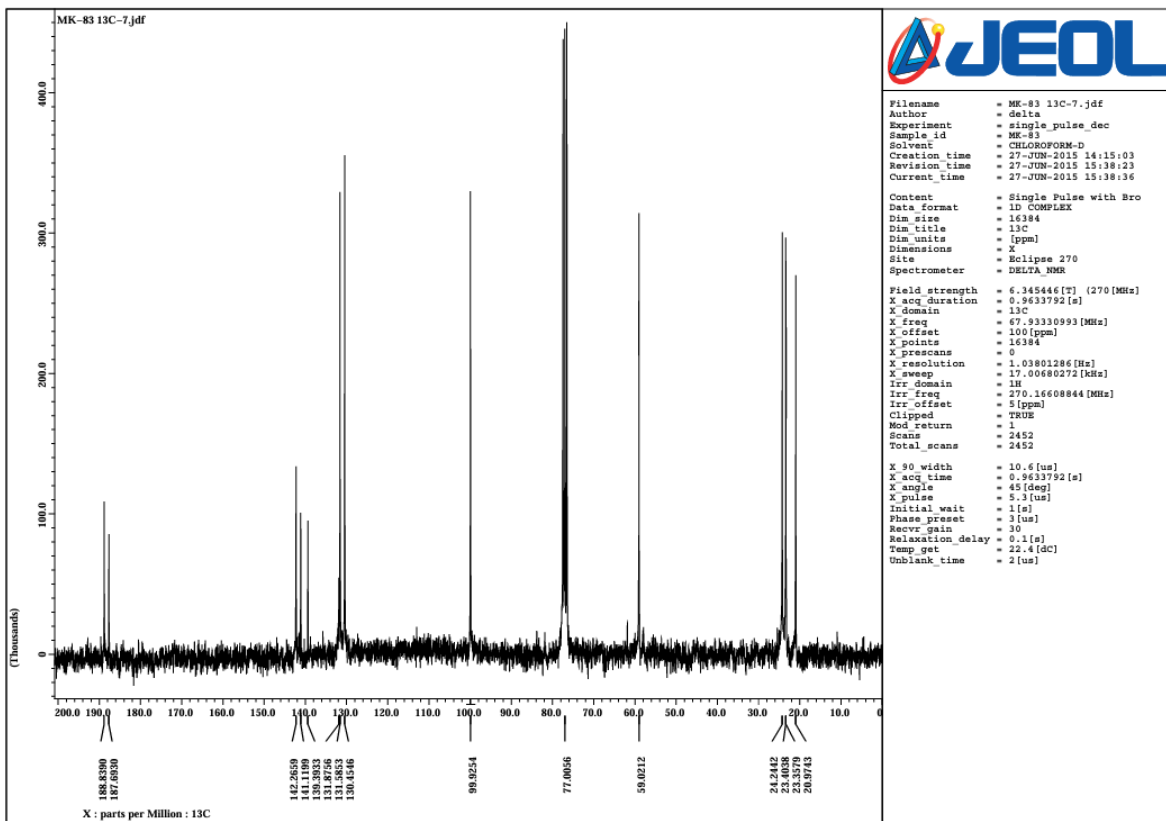

Fig. S33.  $^{13}\text{C}$  NMR spectrum of compound  $\text{Mes}[\text{CH}_3(\text{OH})\text{CHC}(\text{O})\text{CH}_2]\text{TeCl}_2$  (**5**) in  $\text{CDCl}_3$ .

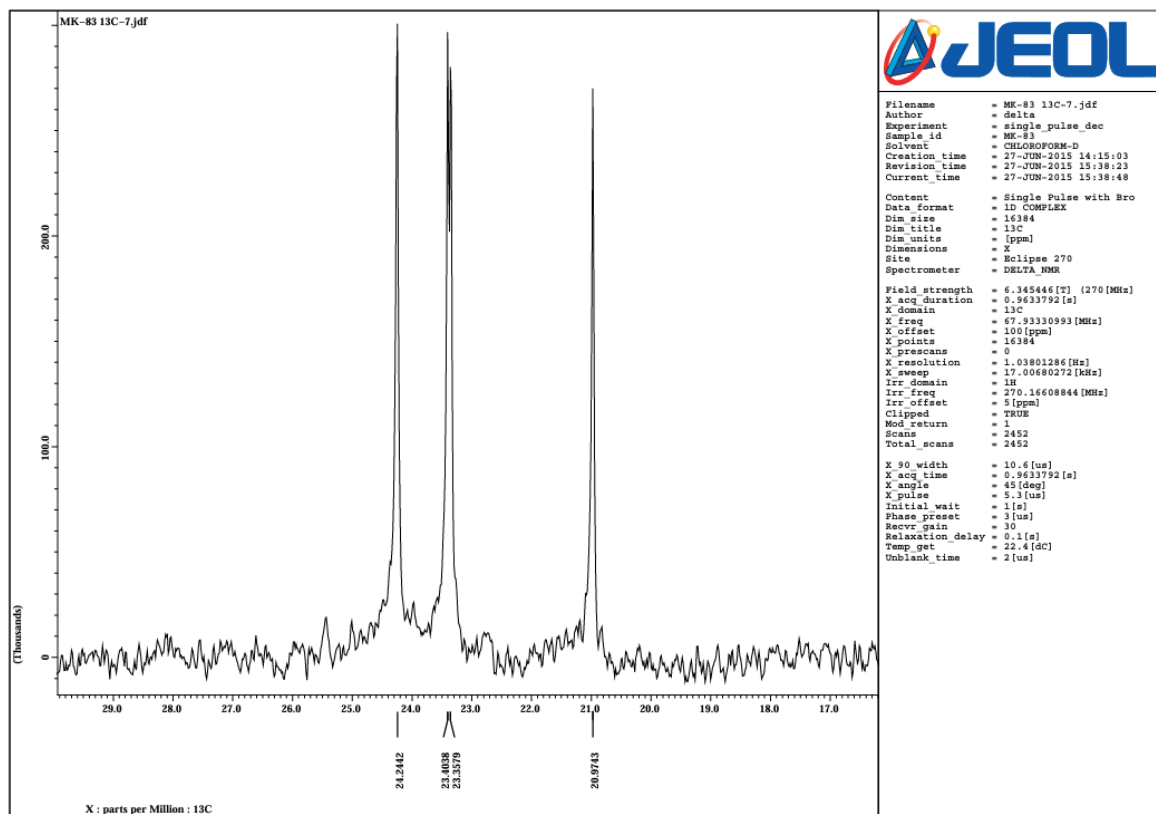

**Fig. S34.** Expanded alkyl region of  $^{13}\text{C}$  NMR spectrum of compound  $\text{Mes}[\text{CH}_3(\text{OH})\text{CHC}(\text{O})\text{CH}_2]\text{TeCl}_2$  (**5**) in  $\text{CDCl}_3$ .

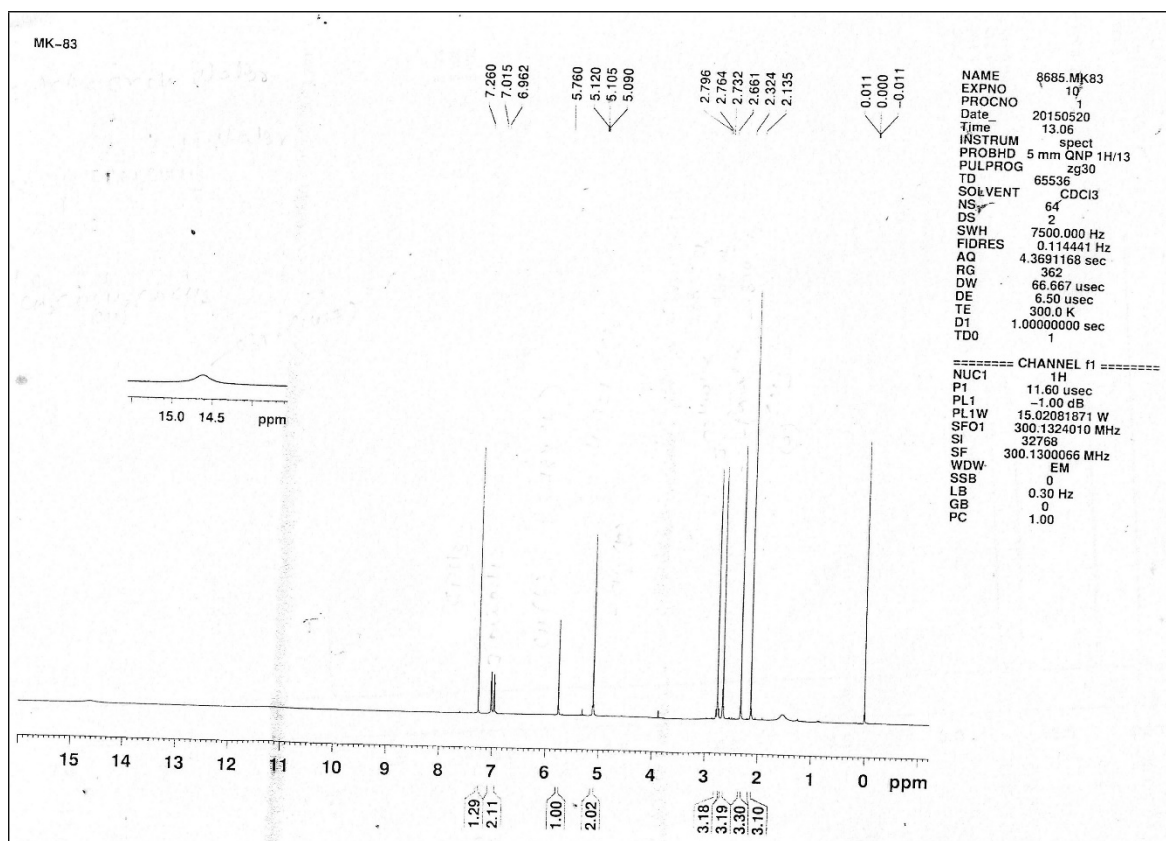

**Fig. S35.**  $^1\text{H}$  NMR spectrum of compound  $\text{Mes}[\text{CH}_3(\text{OH})\text{CHC}(\text{O})\text{CH}_2]\text{TeBr}_2$  (**6**).

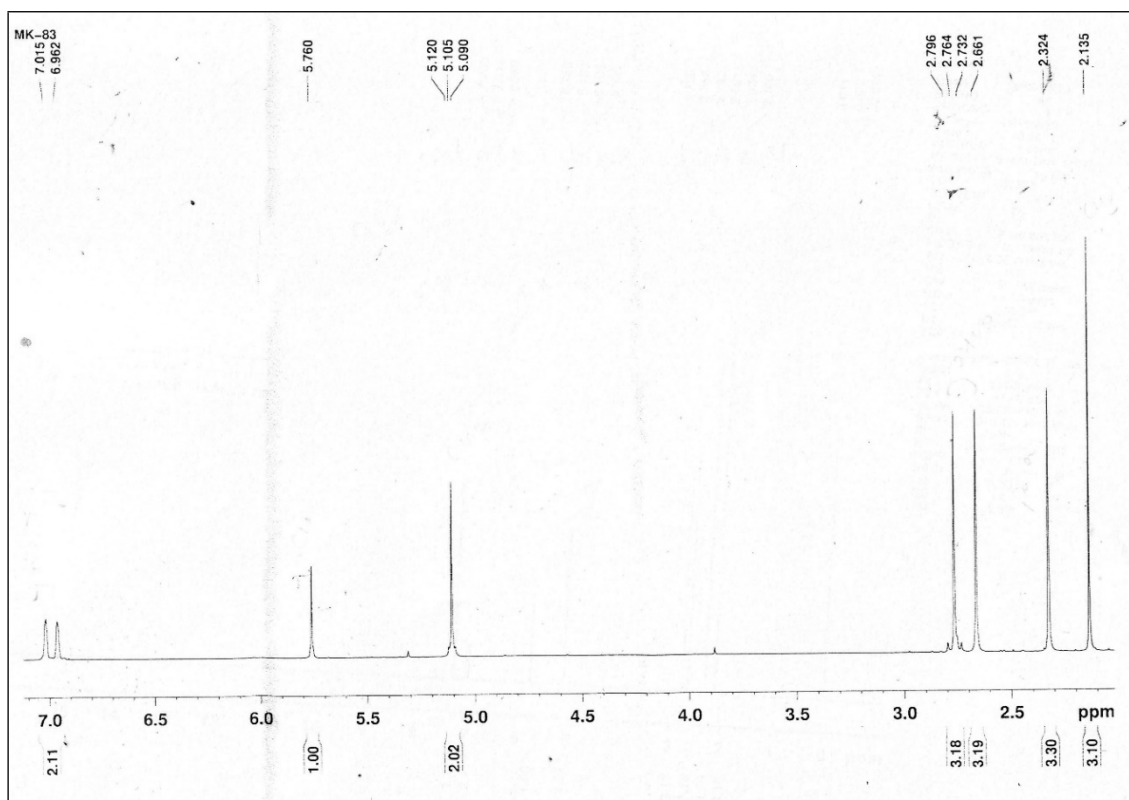

**Fig. S36.** <sup>1</sup>H NMR spectrum of compound Mes[CH<sub>3</sub>(OH)CHC(O)CH<sub>2</sub>]TeBr<sub>2</sub> (**6**).

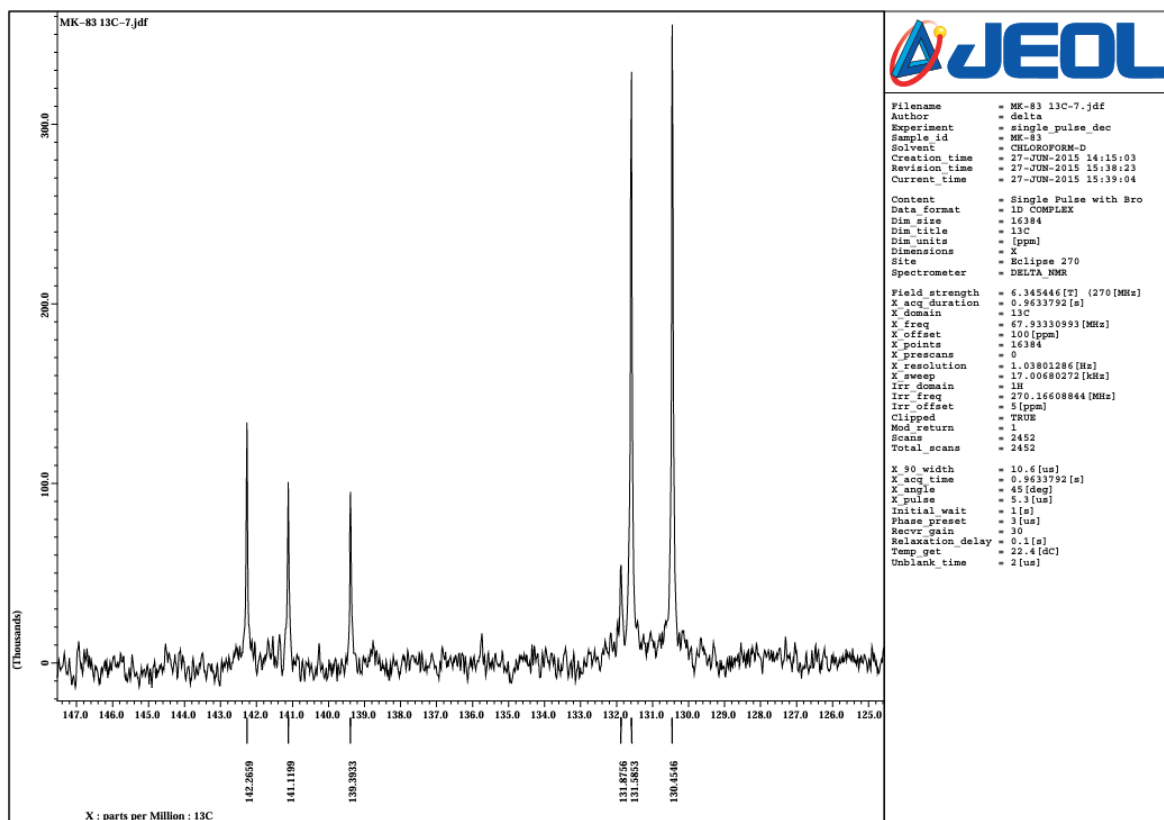

**Fig. S37.** Expanded aryl region of  $^{13}\text{C}$  NMR spectrum of compound Mes[CH<sub>3</sub>(OH)CHC(O)CH<sub>2</sub>]<sub>2</sub>TeBr<sub>2</sub> (**6**) in CDCl<sub>3</sub>.

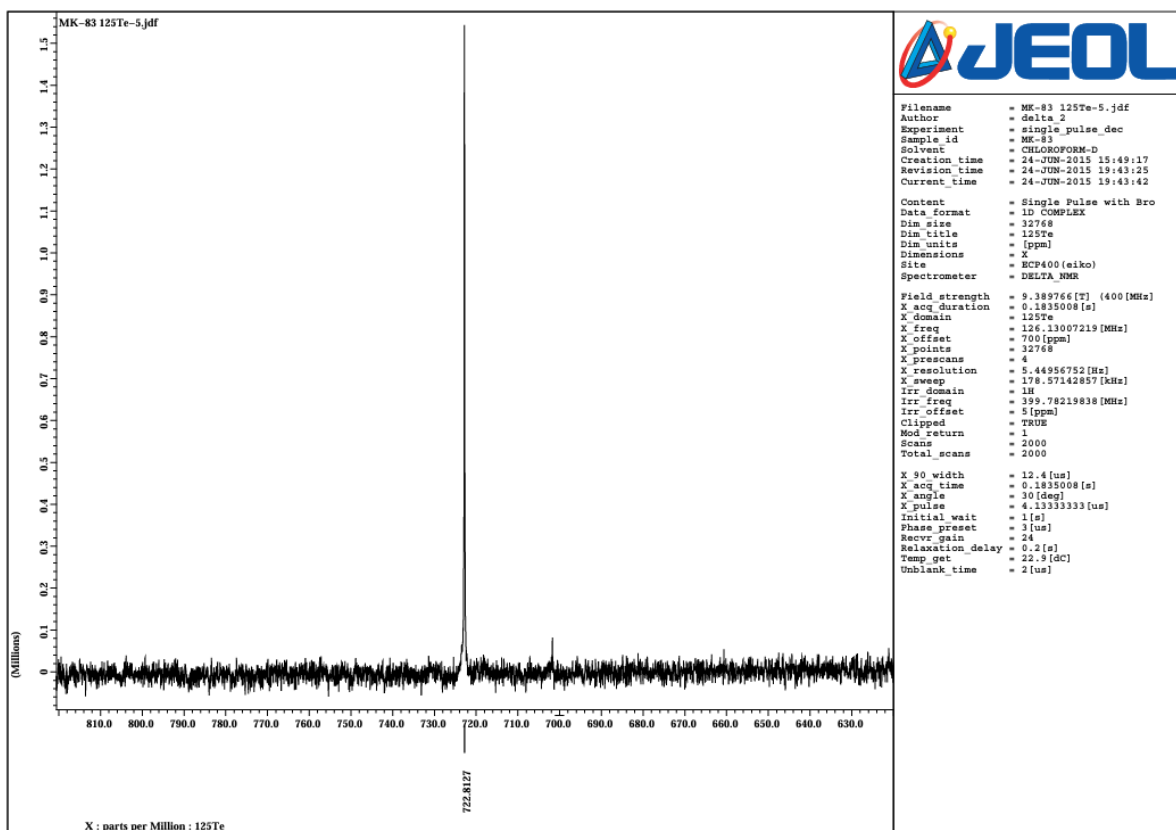

**Fig. S38.**  $^{125}\text{Te}$  NMR spectrum of compound  $\text{Mes}[\text{CH}_3(\text{OH})\text{CHC}(\text{O})\text{CH}_2]\text{TeBr}_2$  (**6**) in  $\text{CDCl}_3$ .
